# 1 **Neural dynamics at successive stages of the ventral visual stream are** 2 **consistent with hierarchical error signals**

3 Running title: Error signaling in the ventral stream

4 Elias B. Issa<sup>1\*</sup>, Charles F. Cadieu<sup>2</sup>, and James J. DiCarlo

5  
6 McGovern Institute for Brain Research and Department of Brain and Cognitive Sciences  
7 Massachusetts Institute of Technology, Cambridge, Massachusetts 02139

8  
9 \*Correspondence: Elias Issa, [elias.issa@columbia.edu](mailto:elias.issa@columbia.edu)

10  
11 <sup>1</sup>Current address: Department of Neuroscience, Zuckerman Mind Brain Behavior Institute, Columbia  
12 University, New York, NY 10027

13 <sup>2</sup>Current address: Bay Labs, Inc. San Francisco, CA 94102

## 14 **AUTHOR CONTRIBUTIONS**

15 Conceptualization, E.B.I and J.J.D.; Methodology, E.B.I., C.F.C, and J.J.D.; Investigation, E.B.I.; Formal  
16 Analysis: E.B.I. and C.F.C; Writing – Original Draft, E.B.I., C.F.C., and J.J.D.; Writing – Review &  
17 Editing, E.B.I. and J.J.D.; Funding Acquisition, E.B.I., C.F.C., and J.J.D.; Resources, J.J.D.;  
18 Supervision, J.J.D.  
19

## 20 **ABSTRACT**

21  
22  
23 Ventral visual stream neural responses are dynamic, even for static image presentations. However,  
24 dynamical neural models of visual cortex are lacking as most progress has been made modeling static,  
25 time-averaged responses. Here, we studied population neural dynamics during face detection across  
26 three cortical processing stages. Remarkably, ~30 milliseconds after the initially evoked response, we  
27 found that neurons in intermediate level areas decreased their preference for faces, becoming anti-face  
28 preferring on average even while neurons in higher level areas achieved and maintained a face  
29 preference. This pattern of hierarchical neural dynamics was inconsistent with extensions of standard  
30 feedforward circuits that implemented recurrence within a cortical stage. Rather, recurrent models  
31 computing errors between stages captured the observed temporal signatures. Without additional  
32 parameter fitting, this model of neural dynamics, which simply augments the standard feedforward  
33 model of online vision to encode errors, also explained seemingly disparate dynamical phenomena in  
34 the ventral stream.  
35

## 36 INTRODUCTION

37 The primate ventral visual stream is a hierarchically organized set of cortical areas beginning with the  
38 primary visual cortex (V1) and culminating with distributed patterns of neural firing across the inferior  
39 temporal cortex (IT) that explicitly encode objects (i.e. linearly decodable object identity) (Hung,  
40 Kreiman, Poggio, & DiCarlo, 2005) and quantitatively account for core invariant object discrimination  
41 behavior in primates (Majaj, Hong, Solomon, & DiCarlo, 2015). Formalizing object recognition as the  
42 result of a series of feedforward computations yields models that achieve impressive performance in  
43 object categorization (Krizhevsky, Sutskever, & Hinton, 2012)(Zeiler & Fergus, 2013) similar to the  
44 absolute level of performance achieved by IT neural populations, and these models are the current best  
45 predictors of neural responses in IT cortex and its primary input layer, V4 (Cadieu et al., 2014)(Yamins  
46 et al., 2014). Thus, the feedforward inference perspective provides a simple but powerful, first-order  
47 framework for the ventral stream and core invariant object recognition.

48

49 However, visual object recognition behavior may not be executed via a single feedforward neural  
50 processing pass (a.k.a. feedforward inference) because IT neural responses are well-known to be  
51 dynamic even in response to images without dynamic content (Brincat & Connor, 2006)(Sugase,  
52 Yamane, Ueno, & Kawano, 1999)(Chen et al., 2014)(Meyer, Walker, Cho, & Olson, 2014), raising the  
53 question of what computations those neural activity dynamics might reflect. Prior work has proposed  
54 that such neuronal response dynamics could be the result of different types of circuits executing  
55 different types of computation such as: 1) recurrent circuits within each ventral stream processing stage  
56 implementing local normalization of the feedforward information as it passes through the stage  
57 (Carandini, Heeger, & Movshon, 1997)(Schwartz & Simoncelli, 2001)(Carandini & Heeger, 2012), 2)  
58 feedback circuits between each pair of ventral stream stages implementing the integration of top-down  
59 with bottom-up information to improve the current (online) inference (Seung, 1997)(Lee, Yang, Romero,  
60 & Mumford, 2002)(Zhang & Heydt, 2010)(Epshtein, Lifshitz, & Ullman, 2008), or 3) feedback circuits

61 between each pair of stages comparing top-down and bottom-up information to compute prediction  
62 errors that guide changes in synaptic weights so that neurons are better tuned to features useful for  
63 future feedforward behavior (learning) (Rao & Ballard, 1999). Thus, neural dynamics may reflect the  
64 various adaptive computations (within-stage normalization, top-down Bayesian inference) or reflect the  
65 underlying error intermediates that could be generated during those processes (e.g. predictive coding).

66

67       These computationally motivated ideas can each be implemented as neural circuits to ask which  
68 idea best predicts response dynamics across the visual hierarchy. Here, our main goal was to look  
69 beyond the initial, feedforward response edge to see if we could disambiguate among dynamics that  
70 might result from stacked feedforward, lateral, and feedback operations. Rather than record from a  
71 single processing level, we measured the dynamics of neural signals across three hierarchical levels  
72 (pIT, cIT, aIT) within macaque IT. We focused on face processing subregions within each of these  
73 levels for three reasons. First, prior evidence argues that these three subregions are tightly  
74 anatomically and functionally connected and that the subregion in pIT is the dominant input to the  
75 higher subregions (Grimaldi, Saleem, & Tsao, 2016)(Moeller, Freiwald, & Tsao, 2008). Second,  
76 because prior work argues that a key behavioral function of these three subregions is to distinguish  
77 faces from non-faces, this allowed us to focus our testing on a relatively small number of images  
78 targeted to engage that processing function. Third, prior knowledge of pIT neural tuning properties (Issa  
79 & DiCarlo, 2012) allowed us to design images that were quantitatively matched in their ability to drive  
80 neurons in the pIT input subregion but that should ultimately be processed into two separate groups  
81 (face vs. non-face). We reasoned that these images would force important computations for  
82 disambiguation to occur somewhere between the pIT subregion and the higher level (cIT, aIT)  
83 subregions. With this setup, our aim was to observe the dynamics at all three levels of the hierarchy in  
84 response to that image processing challenge so that we might discover – or at least constrain -- which  
85 type of computation is at work.

86

87 Consistent with the idea that the overall system performs face vs. non-face discrimination (i.e.  
88 face detection), we found that in the highest face processing stage (aIT), neurons rapidly developed  
89 and maintained a response preference for faces over non-faces even though our images were  
90 designed to be challenging for frontal face detection. However, we found that many neurons in the early  
91 (pIT) and intermediate (cIT) processing levels of IT had face selectivity that rapidly but paradoxically  
92 *decreased*. That is, the responses of these neurons evolved to prefer images of non-faces over images  
93 of faces within 30 milliseconds of their feedforward response. We found that standard feedforward  
94 models that employ local recurrences such as adaptation, lateral inhibition, and normalization could not  
95 capture this stage-wise pattern of image selectivity despite our best attempts. However, we found that  
96 *decreasing* -- rather than increasing -- face preference in early and intermediate processing stages is a  
97 natural dynamical signature of previously suggested “error coding” models (Rao & Ballard, 1999) in  
98 which the neural spiking activity at each processing stage carries both an explicit representation of the  
99 variables of interest (e.g. is a face present?) and an explicit encoding of errors computed between each  
100 pair of stages in the hierarchy (e.g. a face was predicted, but a non-face was present leading to an  
101 error).

102

## 103 **RESULTS**

104 We leveraged the hierarchically arranged face processing system in macaque ventral visual cortex to  
105 study the dynamics of neural processing across a hierarchy (Tsao, Freiwald, Tootell, & Livingstone,  
106 2006)(Tsao, Moeller, & Freiwald, 2008) (**Figure 1A**). The serially arranged posterior, central, and  
107 anterior face-selective subregions of IT (pIT, cIT, and aIT) can be conceptualized as building increasing  
108 selectivity for faces culminating in aIT representations (Freiwald & Tsao, 2010)(Chang & Tsao, 2017).  
109 Using serial, single electrode recording, we sampled neural sites across the posterior to anterior extent  
110 of the IT hierarchy in the left hemispheres of two monkeys to generate neurophysiological maps

111 **(Figure 1A**; example neurophysiological map in one monkey using a faces versus non-face objects  
112 screen set) (Issa, Papanastassiou, & DiCarlo, 2013). We localized the recording locations *in vivo* and  
113 co-registered across all penetrations using a stereo microfocal x-ray system (~400 micron *in vivo*  
114 resolution) (Cox, Papanastassiou, Oreper, Andken, & DiCarlo, 2008)(Issa, Papanastassiou, Andken, &  
115 DiCarlo, 2010) allowing accurate assignment of sites to different face processing stages (n = 633 out of  
116 1891 total sites recorded were assigned as belonging to a face-selective subregion based on their  
117 spatial location; see **Methods**). Results are reported here for sites that were spatially located in a face-  
118 selective subregion, that showed visual drive to any category in the screen set (see **Methods**), and that  
119 were subsequently tested with our face versus non-face challenge set (**Figure 1B**, left panel) (n = 115  
120 pIT, 70 cIT, and 40 aIT sites).

121

122 Our experimental design was intended to test previously proposed computational hypotheses of  
123 hierarchical neural dynamics during visual face processing (**Figure 1B**). Briefly, these hypotheses  
124 predict how stimulus preference (in this instance, for faces versus non-faces) might change over time in  
125 a neural population (**Figure 1B**, middle panel): (1) simple spike-rate adaptation predicts that initial rank-  
126 order selectivity (i.e. relative stimulus preference) will be largely preserved (**Figure 1B**, dashed line)  
127 while neurons adapt their absolute response strength over time, (2) local normalization predicts that  
128 stronger responses are in some cases normalized to match weaker responses based on population  
129 activity to specific dimensions (Carandini et al., 1997); importantly, normalization is strongest for  
130 nuisance (non-coding) dimensions (e.g. low versus high stimulus contrast) and in its idealized form  
131 would not alter selectivity along coding dimensions (e.g. face versus non-face) (**Figure 1B**, dashed  
132 line), (3) evidence accumulation through temporal integration, winner-take-all through recurrent  
133 inhibition, or Bayesian inference through top-down feedback mechanisms all predict increasing  
134 selectivity for faces over time (Lee & Mumford, 2003) (**Figure 1B**, light gray line), and (4) predictive  
135 coding posits that, for neurons that are coding error, their responses would show increasing activity for

136 non-faces (images whose properties are inconsistent with predictions of a face) and thus decreasing  
137 face selectivity over time (Rao & Ballard, 1999) (**Figure 1B**, black line). Note, that error signaling is a  
138 qualitatively different computation than normalization, as error coding predicts a decreased response  
139 along the coding dimension (face versus non-face) whereas normalization would ideally not affect  
140 selectivity for faces versus non-faces and only affect variation along orthogonal, nuisance dimensions.  
141 Properly testing these predictions (no change in face selectivity, increased face selectivity, decreased  
142 selectivity to be anti-face preferring) requires measurements from the intermediate stages of the  
143 hierarchy as all of these models operate under the premise that the system builds and maintains a  
144 preference for faces at the top of the hierarchy (**Figure 1B**, right, and see Introduction). Thus, the  
145 intermediate stages (here pIT, see **Figure 1B**) are most likely to be susceptible to face/non-face  
146 confusion and thus be influenced by, for example, the top-down mechanisms posited in Bayesian  
147 inference and predictive coding where higher areas encode the face predictions that directly influence  
148 the responses of lower areas (Lee & Mumford, 2003)(Rao & Ballard, 1999).

149

### 150 **Face and non-face images driving similar initial responses in pIT**

151 Here, we chose to focus our key, controlled tests on pIT – an intermediate stage in the ventral stream  
152 hierarchy, but the first stage within IT where neural specialization for face detection (i.e. face vs. non-  
153 face) has been reported (Grimaldi et al., 2016). Consistent with its intermediate position in the ventral  
154 visual system, we had previously found that pIT face-selective neurons are not truly selective for whole  
155 faces but respond to local face features, specifically those in the eye region (Issa & DiCarlo, 2012).  
156 Taking advantage of this prior result, we created both face and non-face stimuli that challenged the  
157 face processing system by strongly driving pIT responses, thus forcing the higher IT stages to complete  
158 the discrimination between face and challenging non-face images. To generate ambiguous face-like  
159 images, we systematically varied the positions of parts, in particular the eye, within the face (Issa &  
160 DiCarlo, 2012) (see **Methods**). This set included images that contained face parts in positions

161 consistent with a frontal view of a face or images that only differed in the relative spatial configuration of  
162 the face parts within the face outline (**Figure 1B**, left). Of the 82 images screened, we identified 21 part  
163 configurations that each drove the pIT population response to  $\geq 90\%$  of its response to a correctly  
164 configured whole face. Of those 21 images, 13 images were inconsistent with the part configuration of a  
165 frontal face (**Figure 1B**, black box). For the majority of the results that follow, we focus on comparing  
166 the neural responses to these 13 pIT-matched images that could *not* have arisen from frontal faces  
167 (referred to hereafter as “non-face images”) with the 8 images that could have arisen from frontal faces  
168 (referred to hereafter as “face images”). Again, we stress that these two groups of images were  
169 selected to evoke closely matched initial pIT population activity.

170

171       Importantly, the pIT-matched images used here presented a more stringent test of face vs. non-  
172 face discrimination than prior work. Specifically, most prior work used images of faces and non-face  
173 objects (“classic images”) that contain differences across multiple dimensions including local contrast,  
174 spatial frequency, and types of features (Tsao et al., 2006)(Afraz, Kiani, & Esteky, 2006)(Moeller,  
175 Crapse, Chang, & Tsao, 2017)(Sadagopan, Zarco, & Freiwald, 2017). Consistent with this, we found  
176 that the population decoding classification accuracy of our recorded neural populations using these  
177 classic images (faces versus non-face objects) is near perfect ( $>99\%$  in pIT, cIT, and aIT,  $n=30$  sites  
178 per region). However, we found that population decoding classification accuracy for the pIT-matched  
179 face vs. non-face images we used here was near chance level (50%) in pIT (**Figure 1C**, blue bar; by  
180 comparison, classification accuracy for face versus non-face objects classification was 99.6% using the  
181 same pIT sites). Further downstream in regions cIT and aIT, we found that the linear population  
182 decoding classification of these pIT-matched face vs. non-face images was well above chance,  
183 suggesting that our pIT-matched face detection challenge is largely solved somewhere between pIT  
184 and aIT (**Figure 1C**).

185

186 **Time course of responses in pIT for images with face versus non-face arrangements of parts**

187 We next closely examined the pIT neural response dynamics. To do this, we defined a face preference  
188 value ( $d'$ ; see Methods) that measured each site's average selectivity for the face images relative to the  
189 non-face images, and we asked how a given site's preference evolved over time (see alternative  
190 hypotheses in **Figure 1B**). First, we present three example sites which were chosen based on having  
191 the largest selectivity (absolute  $d'$ ) in the late phase (100-130 ms post image onset). In particular, most  
192 standard interpretations of face processing would predict a late phase preference for faces ( $d' > 0$ ).  
193 However, all three sites with the largest absolute  $d'$  had evolved a strong late phase preference for the  
194 non-face images ( $d' < 0$ ) despite having had very similar rising edge responses to the face and non-  
195 face stimulus classes (response in early phase from 60-90 ms) (**Figure 2**, left column). A late, non-face  
196 preference was not restricted to the example sites as a majority of pIT sites (66%) preferred non-faces  
197 over faces in the late response phase (prefer frontal face arrangement: 60-90 ms = 66% vs. 100-130  
198 ms = 34%;  $p = 0.000$ ,  $n = 115$ ) (**Figure 3B**, blue bars).

199 Next, we examined the dynamics of face selectivity across the pIT population as this is key to  
200 disambiguating among the competing models outlined earlier (**Figure 1B**). In the adaptation and  
201 normalization models, we would expect no change in the average population face selectivity, and the  
202 evidence accumulation, winner-take-all, or Bayesian inference models predict an increase in face  
203 selectivity over the population over time. Instead, we found that many sites significantly decreased their  
204 face preference over time similar to the three example sites. Of the 51 sites in our pIT sample that  
205 showed a significantly changing preference over time ( $p < 0.01$  criterion for significant change in  $d'$ ),  
206 84% of these sites showed a decreasing preference ( $n = 43$  of 51 sites,  $p < 10^{-6}$ , binomial test,  $n =$   
207 115 total sites) (**Figure 3A**, left column, light gray vs. black lines). This surprising trend -- decreasing  
208 face preference -- was strong enough that it erased any small, initial preference for images of frontally  
209 arranged face parts over the population (median  $d'$ : 60-90 ms =  $0.11 \pm 0.02$  vs. 100-130 ms =  $-0.12 \pm$   
210  $0.03$ ,  $p = 0.000$ ,  $n=115$  sites), and this trend was observed in both monkeys when analyzed separately



211 ( $p_{M1} = 0.000$ ,  $p_{M2} = 0.002$ ,  $n_{M1} = 43$ ,  $n_{M2} = 72$  sites; **Figure 4A**). This decreasing face selectivity over  
212 time was driven by decreasing firing rates to the face images containing normally arranged face parts.  
213 Responses to these images were weaker by 18% on average in the late phase of the response  
214 compared to the early phase ( $\Delta\text{rate}$  (60-90 vs 100-130 ms) =  $-18\% \pm 4\%$ ,  $p = 0.000$ ;  $n = 7$  images)  
215 while responses to the non-face images with atypical spatial arrangements of face parts -- also capable  
216 of driving high early phase responses -- did not experience any firing rate reduction in the late phase of  
217 the response ( $\Delta\text{rate}$  (60-90 vs 100-130 ms) =  $2 \pm 1\%$ ,  $p = 0.467$ ;  $n = 13$  images).

218

219 The above observation of decreasing face preference over the pIT population seemed most  
220 consistent with the prediction of error coding models, but one potential confound was that initial  
221 responses to faces and challenging non-faces were not perfectly matched across the population (recall  
222 that we only required face and non-face images to drive a response  $\geq 90\%$  of the whole face response).  
223 As a result, initial selectivity was non-zero ( $d' = 0.11$ ,  $n=115$  sites). This residual face preference may  
224 be small, but if this residual face selectivity is driven by nuisance dimensions, for example excess  
225 stimulus contrast in the face class relative to the non-face class, then the face class may have  
226 experienced stronger activity dependent adaptation or normalization resulting in a decreasing face  
227 preference over time. To more adequately limit general activity dependent mechanisms leading to  
228 decreasing face responses, we performed control analyses where initial activity was tightly matched per  
229 site or where the number of parts were matched across images.

230

### 231 **Controls in pIT for firing rate and low-level image variation**

232 To strictly control for the possibility that simple initial firing rate differences could predict the observed  
233 phenomenon, we re-computed selectivity after first matching initial responses site-by-site. For this  
234 analysis, images were selected on a per site basis to evoke similar initial firing rates (images driving

235 initial response within 25% of synthetic whole face response for that site, at least 5 images required per  
236 class). This image selection procedure virtually eliminated any differences in initial responses between  
237 the face and non-face image classes and hence any firing rate difference driven by differences in  
238 nuisance parameters between faces and challenge non-faces (**Figure 3C**, 60-90 ms), yet we still  
239 observed a significant drop in preference for images with typical frontal face part arrangements versus  
240 atypical face part arrangements in pIT ( $\Delta d' = -0.10 \pm 0.03$ ,  $p = 0.001$ ,  $n = 77$ ) (**Figure 3C**, blue line).  
241 Thus, the remaining dependence of firing rate dynamics on the image class and not on initial response  
242 strength argued against an exclusively activity based explanation to account for decreasing neural  
243 responses to faces over time. Further arguing against this hypothesis, we found that the pattern of late  
244 phase population firing rates in pIT across images could not be significantly predicted from early phase  
245 pIT firing rates for each image ( $\rho_{\text{pIT early, pIT late}} = 0.07 \pm 0.17$ ,  $p = 0.347$ ;  $n = 20$  images).

246 Thus far, we have performed analyses where images from the face and non-face class were  
247 similar in their initially evoked response which equated images at the level of neural activity but  
248 produced images varying in the number of parts. An alternative is to match the number of face parts  
249 between the face and non-face classes as another means of limiting the differences in nuisance  
250 dimensions such as the contrast, spatial frequency and retinal position of energy across images (see  
251 examples in **Figure 4B**). When we recomputed selectivity across subsets of images containing a  
252 matched number of one, two, or four parts ( $n=5$ , 30, and 3 images, respectively), we still observed that  
253 pIT face selectivity decreased. For all three image subsets controlling the number of face parts,  $d'$   
254 began positive on average in the sampled pIT population (i.e. preferred frontal face part arrangements  
255 in 60-90 ms post-image onset) (median  $d'$  for 60-90 ms =  $0.13 \pm 0.05$ ,  $0.05 \pm 0.02$ ,  $0.33 \pm 0.09$  for one,  
256 two, and four parts) and significantly decreased in the next phase of the response (100-130 ms post-  
257 image onset) becoming negative on average (median  $d'$  for 100-130 ms:  $-0.27 \pm 0.06$ ,  $-0.14 \pm 0.02$ , -  
258  $0.04 \pm 0.12$ ; one, two, four parts:  $p = 0.000$ ,  $0.000$ ,  $0.004$ , for  $d'$  comparisons between 60-90 ms and

259 100-130 ms,  $n = 115$ ,  $115$ ,  $76$  sites) (**Figure 4B**). A similar decreasing face selectivity profile was  
260 observed when we re-tested single part images at smaller ( $3^\circ$ ) and larger ( $12^\circ$ ) image sizes suggesting  
261 a dependence on the relative configuration of the parts and not on their absolute retinal location or  
262 absolute retinal size (median  $d'$  for 60-90 ms vs. 100-130 ms: three degrees =  $0.51 \pm 0.09$  vs.  $-0.29 \pm$   
263  $0.14$ , twelve degrees =  $0.07 \pm 0.14$  vs.  $-0.11 \pm 0.14$ ;  $n = 15$ ;  $p = 0.000, 0.025, 0.07$ ) (**Figure 4C**). Thus,  
264 we suggest that the decreasing population face selectivity dynamic in pIT is a fairly robust phenomenon  
265 specific to the face versus non-face dimension as this dynamic persists even when limiting potential  
266 variation across nuisance dimensions. This phenomenon can be distinguished from normalization  
267 mechanisms that would operate most strongly to reduce selectivity along nuisance dimensions rather  
268 than along dimensions that directly solve the face versus non-face discrimination challenge.

269

#### 270 **Time course of responses in aIT and cIT for images with face versus non-face arrangements of** 271 **parts**

272 Under the possibility that decreasing face selectivity in intermediate stage pIT is a signature of error  
273 signaling, we next asked whether the source of the prediction signal could be observed in higher  
274 cortical areas. In the anterior face-selective regions of IT which are furthest downstream of pIT and  
275 reflect additional stages of feedforward processing (see block diagram in **Figure 1B**), we did not  
276 observe the strong decreases in the selectivity profile seen in pIT. Indeed, the three sites with the  
277 greatest selectivity (absolute  $d'$ ) in the late response phase (100-130 ms) in our aIT sample all  
278 displayed a preference for frontal face part arrangements ( $d' > 0$ ) (**Figure 2**, right column). Also, in  
279 contrast to the dynamic selectivity profiles observed in many pIT sites, 98% of aIT sites (39 of 40) did  
280 not significantly change their relative preference for face vs. non-face arrangements of the parts ( $p <$   
281  $0.01$  criterion for significant change at the site level) (**Figure 3A**, right column, bottom row, dark gray  
282 sites). Rather, we observed a stable selectivity profile over time in aIT (median  $d'$ : 60-90 ms =  $0.13 \pm$   
283  $0.03$  vs. 100-130 ms =  $0.17 \pm 0.03$ ,  $p = 0.34$ ,  $n=40$  sites). As a result, the majority of anterior sites

284 preferred images with typical frontal arrangements of the face parts in the late phase of the response  
285 (prefer face: 60-90 ms = 78% of sites vs. 100-130 ms = 78% of sites;  $p = 0.451$ ,  $n = 40$  sites; **Figure**  
286 **3B**, red bars) despite only a minority (34%) of upstream sites in pIT preferring these images in their late  
287 response. Thus, spiking responses of individual aIT sites were as expected from a computational  
288 system whose purpose is to detect faces, as previously suggested (Freiwald & Tsao, 2010), and aIT  
289 serves as one candidate for the putative prediction signal underlying face prediction errors.

290

291 In cIT whose anatomical location is intermediate to pIT and aIT, we observed many sites with  
292 decreasing selectivity (**Figure 2C & 3A**, middle columns), a dynamic that persisted even when we  
293 tightly matched initial responses on a site by site basis similar to pIT (**Figure 2C**, green line). The  
294 overall stimulus preference in cIT was intermediate to that of pIT and aIT (**Figure 3B**) consistent with  
295 the intermediate position of cIT in the IT hierarchy. Interestingly, we found that the patterns of  
296 responses across images in the early phases of cIT and aIT activity were significant predictors of late  
297 phase activity in pIT ( $\rho_{\text{cIT early, pIT late}} = -0.52 \pm 0.11$ ,  $p = 0.000$ ;  $\rho_{\text{aIT early, pIT late}} = -0.36 \pm 0.14$ ,  $p = 0.012$ ;  
298  $n_{\text{pIT}}=115$ ,  $n_{\text{cIT}}=70$ ,  $n_{\text{aIT}}=40$  sites;  $n = 20$  images), even better predictors than early phase activity in pIT  
299 itself ( $\rho_{\text{pIT early, pIT late}} = 0.07 \pm 0.17$ ,  $p = 0.347$ ). That is, for images that produced high early phase  
300 responses in cIT and aIT, the following later phase responses of units in the lower level area (pIT)  
301 tended to be low, consistent with error coding models which posit that feedback from higher areas (in  
302 the form of predictions) would contribute to the decreasing selectivity observed in lower areas.

303

### 304 **Computational models of neural dynamics in IT**

305 We next proceeded to formalize the conceptual ideas introduced in **Figure 1B** and build neurally  
306 mechanistic, dynamical models of gradually increasing complexity to determine the minimal set of  
307 assumptions that could capture our empirical findings of non-trivial, dynamic selectivity changes during

308 face detection across face-selective subregions in IT. Previous functional and anatomical data show  
309 that the face-selective subregions in IT are connected forming an anterior to posterior hierarchy and  
310 show that pIT serves as the primary input into this hierarchy (Moeller et al., 2008)(Freiwald & Tsao,  
311 2010)(Grimaldi et al., 2016). Thus, we evaluated dynamics in different hierarchical architectures using a  
312 linear dynamical systems modeling framework where pIT, cIT, and aIT act as sequential stages of  
313 processing (**Figure 5** and see **Methods**). A core principle of feedforward ventral stream models is that  
314 object selectivity is built by stage-wise feature integration in a manner that leads to relatively low  
315 dimensional representations at the top of the hierarchy abstracted from the high-dimensional input  
316 layer. We were interested in how signals temporally evolve across a similar architectural layout. We  
317 used the simplest feature integration architecture where a unit in a downstream area linearly sums the  
318 input from units in an upstream area, and we stacked this computation to form three layer networks  
319 (**Figure 5B**). This simple, generic feedforward encoding model conceptualizes the idea that different  
320 types of evidence, local and global (i.e. information about the parts and the relative spatial arrangement  
321 of parts), have to converge and be integrated to separate face from non-face images in our image set.  
322 We used linear networks as monotonic nonlinearities can be readily accommodated in our framework  
323 (Seung, 1997)(Rao & Ballard, 1999)(also see **Figure 7C**). Importantly, we used a simple encoding  
324 scheme as our goal was not to build full-scale deep neural network encoding models of image  
325 representation (Yamins et al., 2014) but to bring focus to an important biological property that is often  
326 not considered in deep nets, neural dynamics.

327 We implemented a range of ideas previously proposed in the literature. The functional  
328 implications of these ideas were highlighted in **Figure 1B**, but at a mechanistic level, these functional  
329 properties can be directly realized via different recurrent processing motifs between neurons (**Figure 5**,  
330 base feedforward model (first column) is augmented with recurrent connections to form new models  
331 (remaining columns)). For example, self-connections can be viewed as implementing spike rate  
332 adaptation in a feedforward architecture (**Figure 5A**, top row), lateral connections support winner-take-

333 all or normalization mechanisms (Carandini et al., 1997) (**Figure 5A**, second, third, and fourth  
334 columns), and top-down connections implement Bayesian inference (Seung, 1997) (**Figure 5A**, fifth  
335 and sixth columns). Here, normalization is implemented by a leak term that scales adaptation (the  
336 degree of decay in the response) and is controlled recursively by the summed activity of the network  
337 (Carandini et al., 1997), ultimately scaling down responses to strong driving stimuli over time. To  
338 constrain our choice of a feedback-based model, we took a normative approach minimizing a quadratic  
339 reconstruction cost between stages as the classical reconstruction cost is at the core of an array of  
340 hierarchical generative models including hierarchical Bayesian inference (Lee & Mumford, 2003),  
341 Boltzmann machines (Ackley, Hinton, & Sejnowski, 1985), analysis-by-synthesis networks (Seung,  
342 1997), sparse coding (Olshausen & Field, 1996), predictive coding (Rao & Ballard, 1999), and  
343 autoencoders in general (Rifai, Vincent, Muller, Glorot, & Bengio, 2011). Optimizing a quadratic loss  
344 results in feedforward and feedback connections that are symmetric -- reducing the number of free  
345 parameters -- such that inference on the represented variables at any intermediate stage is influenced  
346 by both bottom-up sensory evidence and current top-down interpretations. Critically, a common feature  
347 of this large model family is the computation of between-stage error signals via feedback, which is  
348 distinct from state-estimating model classes (i.e. feedforward models) that do not compute or propagate  
349 errors. A dynamical implementation of such a network uses leaky integration of error signals which, as  
350 shared computational intermediates, guide gradient descent of the values of the represented variables  
351 to a previously learned target value ( $\Delta$ activity of each neuron  $\Rightarrow$  online inference) or descend the  
352 connection weights to values that give the best future behavior ( $\Delta$ synaptic strengths  $\Rightarrow$  offline learning),  
353 here defined as an unsupervised reconstruction goal (similar results were found using other goals and  
354 networks such as supervised discriminative networks; see **Figure 7C**).

355       When we fit each of the models to our neural data, they generally produced an increase in  
356 selectivity from the first stage of the network to the later stages of the network. This increase is not  
357 surprising because the models had built-in converging feedforward connections from the first to second

358 to third stages (**Figure 6A**, first five columns, compare blue to red curves). However, discrepancies  
359 between models emerged in the lower stages where we found that neither the lateral inhibition model,  
360 nor the normalization model, could capture the decreasing selectivity phenomenon observed in pIT.  
361 Instead, the selectivity of these models simply increased to a saturation level set by the leak term  
362 (shunting inhibition) in the system (**Figure 6A**, first five columns). Similar behavior was present when  
363 we tried a nonlinear implementation of the normalization model that more powerfully modulated  
364 shunting inhibition (Carandini et al., 1997). That normalization proved insufficient to generate the  
365 observed neural dynamics can be explained by the fact that the normalized response to a stimulus  
366 cannot easily fall below the response to a stimulus that was initially similar in strength. Thus, a  
367 decreasing average preference for a stimulus across a population of cells (i.e. **Figures 2-4**, pIT data)  
368 for similar levels of average input is difficult when only using a basic normalization model mediated by  
369 surround (within-stage) suppression.

370

371 In contrast to the above models, we found that the feedback model capable of computing  
372 hierarchical error signals naturally displayed a strong decrease of selectivity in a sub-component of its  
373 first processing stage -- qualitatively similar behavior to the selectivity decrease that we observed in  
374 many pIT and cIT neural sites. Specifically, this model displayed these dynamics in the magnitude of its  
375 reconstruction error signals but not in its state signals (the feature values) (**Figure 6A**, compare fifth  
376 and sixth columns). These error signals integrate converging state signals from two stages -- one  
377 above (prediction) and one below (sensory evidence). The term “error” is thus meaningful in the hidden  
378 processing stages where state signals from two stages can converge. The top nodes of a hierarchy  
379 receive little descending input and hence do not carry additional errors with respect to the desired  
380 computation; rather, top nodes convey the face predictions that influence errors in bottom nodes. This  
381 behavior in the higher processing stages is consistent with our observation of explicit representation of  
382 faces in aIT in all phases of the response (**Figures 2-3**) and with similar observations of decodable

383 identity signals by others in all phases of aIT responses for faces (Meyers, Borzello, Freiwald, & Tsao,  
384 2015) and objects (Hung et al., 2005)(Majaj et al., 2015). We also found similar error dynamics when  
385 using a simpler two-layer network as opposed to three layers suggesting that these error signal  
386 dynamics along with prediction signals emerge even in the simplest cascaded architecture (**Figure 7A**).

387

### 388 **Predictions of an error coding hierarchical model**

389 While our neural observations at multiple stages of the IT hierarchy led us to the error coding  
390 hierarchical model above, a stronger test of the idea of error signaling is whether it predicts other IT  
391 neural phenomena. To identify stimulus regimes that would lead to insightful predictions, we asked in  
392 what way would the behavior of error-estimating hierarchical models differ most from the behavior of  
393 generic feedforward state-estimating models. Because our feedback-based model uses feedforward  
394 inference at its core, it behaves similarly to a state-estimating hierarchical feedforward model when the  
395 statistics of inputs match the learned feedforward weight pattern of the network (i.e. ‘natural’ images  
396 drawn from everyday objects and scenes) since for these inputs, feedforward inferences derived from  
397 the sensory data are aligned with top-down expectations. Thus, predictions of feedback-based models  
398 that could distinguish them from feedforward-only models are produced when the natural statistics of  
399 images are altered so that they differ from the feedforward patterns previously learned by the network  
400 and hence differ from the predictions generated in the network. We have (above) considered one such  
401 type of alteration: images where local face features are present but altered from their naturally  
402 occurring (i.e. statistically most likely) arrangement in frontal faces. Next, we tested two other image  
403 manipulations from recent physiology studies which yielded novel neural phenomena that lacked a  
404 principled, model-based explanation (Freiwald, Tsao, & Livingstone, 2009)(Meyer et al., 2014). To test  
405 whether the error coding hierarchical model family displays these behaviors, we fixed the architectural  
406 parameters derived from our fitting procedure in **Figure 6** and simply varied the input to this network,  
407 specifically the correlation between the inputs and the network’s feedforward weight pattern, in order to



408 match the nature of the image manipulations performed in prior experiments.  
409  
410 *Sublinear integration of the face features.* In the face-selective subregion of cIT, the sum of the  
411 responses to the face parts exceeds the response to the whole face when averaging firing rates over a  
412 200 ms window (Freiwald et al., 2009; see their Figure 2C), and we observed a similar phenomenon in  
413 the face-selective subregion in pIT (Issa & DiCarlo, 2012). Interestingly, examining the dynamics of part  
414 integration more closely within the first 100ms of the response reveals that the response to the whole  
415 face does begin at a level similar to the sum of the responses to the face parts but becomes sublinear  
416 in the late phase (whole face response relatively low compared to linear prediction from parts  
417 responses) (ratio of sum of responses to parts vs. response to whole: 60-90 ms =  $1.5 \pm 0.1$ , 100-130  
418 ms =  $4.6 \pm 0.3$ ;  $p = 0.000$ ,  $n = 33$  sites) (**Figure 8A**, left panel). This result runs counter to what would  
419 be expected in a model where selectivity for the whole face is built from the conjunction of the parts. In  
420 such a model, the population response to the whole face would be at least as large if not greater  
421 (superlinear) than the summed responses to the individual features. To test whether an error coding  
422 model exhibited the phenomenon of sublinear feature integration at the population level, we compared  
423 the response with all inputs active (co-occurring features) to the sum of the responses when each input  
424 was activated independently (individual features). The reconstruction errors in our feedback-based  
425 model showed a strong degree of sublinear integration of the inputs such that the response to the  
426 simultaneous inputs (whole) was much smaller than what would be predicted by a linear sum of the  
427 responses to each input alone (parts), and the model's sublinear integration behavior qualitatively  
428 replicated the time course observed in pIT without any additional fitting of parameters (**Figure 8A**, right  
429 panel). Although we certainly expect that similar sublinear integration may also be observed in a  
430 normalization model, this would require a particularly strong form of normalization since population  
431 activity to the whole face would have to be normalized to nearly the same level as that for an individual  
432 part in the late response phase (ratio of response to single part vs. response to whole =  $0.92 \pm 0.06$ ,

433 100-130 ms,  $n = 33$  sites) despite being three times larger during the early response phase (ratio of  
434 response to single part vs. response to whole =  $0.3 \pm 0.02$ , 60-90 ms,  $n = 33$  sites). Furthermore, the  
435 stacked normalization model could not account for the main dynamical phenomenon that we observed  
436 (**Figure 6**); therefore, an error coding perspective may provide a more parsimonious account of the  
437 observed set of dynamical phenomena.

438

439 *Evolution of neural signals across time.* Neural responses to familiar images are known to rapidly  
440 attenuate in IT when compared to responses to novel images (Freedman, Riesenhuber, Poggio, &  
441 Miller, 2006)(Woloszyn & Sheinberg, 2012)(Meyer & Olson, 2011). This observation seems to  
442 contradict what would be predicted by simple Hebbian potentiation for the more exposed stimuli.  
443 Furthermore, familiar image responses show much sharper temporal dynamics than responses to novel  
444 images when presented repeatedly (Meyer et al., 2014). These qualitatively different dynamics for  
445 familiar versus novel images are surprising given that stimuli are drawn from the same distribution of  
446 natural images and are thus matched in their average image-level statistical properties (color, spatial  
447 frequency, contrast). To test whether our network displayed these different dynamical behaviors, we  
448 simulated familiar inputs as those that match the learned weight pattern of a high-level detector and  
449 novel inputs as those with the same overall input level but with weak correlation to the learned network  
450 weights (here, we have extended the network to include two units in the output stage corresponding to  
451 storage of the two familiarized input patterns to be alternated; conceptually, we consider these familiar  
452 pattern detectors as existing downstream of IT in a region such as perirhinal cortex which has been  
453 shown to code familiarized image statistics and memory-based object signals (Murray, Bussey, &  
454 Saksida, 2007)). We repeatedly alternated two familiar inputs or two novel inputs and found that error  
455 coding model responses in the hidden processing stage were temporally sharper for familiar inputs that  
456 matched the network's feedforward weight patterns compared to novel patterns of input (pseudo-  
457 randomly drawn; see **Methods**), consistent with the previously observed phenomenon (**Figure 8B**; data

458 reproduced with permission from Meyer et al., 2014). Model responses reproduced additional details of  
459 the neural dynamics including a large initial peak followed by smaller peaks for responses to novel  
460 inputs and a phase delay in the oscillations of responses to novel inputs compared to familiar inputs.  
461 Intuitively, these dynamics are composed of two phases after the initial response transient to the onset  
462 of the image sequence. In the first phase, familiar patterns lead to lower errors and hence lower neural  
463 responses than random patterns (**Figure 8B**, red curve drops below the black curve after the onset  
464 response), similar to the observed weaker response to more familiar face-like images present in our  
465 data (**Figure 2**, red curves drop below black curves in pIT example sites). When the familiar pattern *A*  
466 is switched to another familiar pattern *B*, this induces a short-term error in adjusting to the new pattern  
467 (**Figure 8B**, red curve briefly goes above the black curve during pattern switch and then decreases). In  
468 contrast, two unfamiliar patterns are closer together in the high-level encoding space than two learned  
469 patterns (**Figure 8B**, inset at right), and the switch between two unlearned patterns introduces relatively  
470 less shift in top-down signals and hence a smaller dynamical change in error signals. This result  
471 demonstrates that our model, derived from fitting only the first 70 ms (60-130 ms post image onset) of  
472 IT responses to face images, can extend to much longer timescales and may generalize to studies of  
473 images besides face images.

474

#### 475 **Dynamical properties of neurons across cortical lamina**

476 In the large family of state-error coding hierarchical networks, a number of different cortical circuits are  
477 possible. A key distinction of two such circuit mapping hypotheses (predictive coding versus error  
478 backpropagation) is the expected laminar location of state coding neurons transmitting information  
479 about features in the image. In typical neural network implementations, the feedforward projecting  
480 neurons in superficial lamina are presumed to encode estimates about states of the visual world (e.g.  
481 presence of a face). In contrast, predictive coding posits that superficial layers contain error units and  
482 that errors are projected forward to the next cortical level (Rao & Ballard, 1999)(Friston & Kiebel,

483 2009)(Hyvärinen, Hurri, & Hoyer, 2009). State and error signals can be distinguished by their dynamical  
484 signatures in our leading model, which was fit on error signals but produces predictions of the  
485 corresponding state signals underlying the generation of errors. Since state units are integrators (see  
486 **Methods**), they have slower dynamics than error units leading to longer response latencies and a  
487 milder decay in responses (**Figure 8C**, red curve in right panel). To test this prediction, we localized our  
488 recordings relative to the cortical mantle by co-registering the x-ray determined locations of our  
489 electrode (~400 micron *in vivo* accuracy; (Issa et al., 2010)) to structural MRI data (see **Methods**).  
490 When we separated units into those at superficial depths closer to the pial surface (1/3 of our sites;  
491 corresponds to approximately 0 to 1 mm in depth) versus those in the deeper layers (remaining 2/3 of  
492 sites, ~1 to 2.5 mm in depth), we found a longer latency and less response decay in superficial units  
493 consistent with the expected profile of state units (**Figure 8C**, left panel). Thus, the trend toward state-  
494 like signals in superficial layers is more consistent with typical error backpropagation models (states fed  
495 forward, errors fed backward) than with predictive coding proposals. In fact, the latency difference  
496 between cortical lamina in pIT (deep vs superficial:  $66.0 \pm 1.7$  vs  $76.0 \pm 1.8$  ms,  $p = 0.002$ ) was greater  
497 than the conduction delay from pIT to cIT (i.e. from superficial layers of pIT to the deeper layers of cIT)  
498 (superficial pIT vs deep cIT:  $76.0 \pm 1.8$  vs  $75.5 \pm 2.0$  ms,  $p = 0.15$ ) even though laminar distances  
499 within pIT are smaller than the distance traveled between cortical stages pIT and cIT. Thus, instead of a  
500 simple conduction delay accounting for latency differences across lamina, our model suggests that  
501 temporal integration of inputs in superficial lamina, more consistent with the behavior of state units as  
502 opposed to error units, may drive the lagged dynamical properties of neurons in superficial lamina.

503

## 504 **DISCUSSION**

505 We have measured neural responses during a difficult frontal face detection task across the IT  
506 hierarchy and demonstrated that the population preference for faces in the intermediate (a.k.a hidden)  
507 processing stages decreases over time – that is population responses at lower levels of the hierarchy

508 (pIT and cIT) rapidly evolved toward preferring unnatural, non-face part arrangements whereas the top  
509 level (aIT) rapidly developed and then maintained a preference for natural, frontal face part  
510 arrangements. The relative speed of selectivity changes in pIT (~30 ms) makes high-level explanations  
511 based on fixational eye movements or shifts in attention (e.g. from behavioral surprise to unnatural  
512 arrangements of face parts) unlikely as saccades and attention shifts occur on slower timescales  
513 (hundreds of milliseconds) (Egeth & Yantis, 1997). The presence of stronger responses to face images  
514 than to non-face images in aIT further argues against general arousal effects as these would have been  
515 expected to cause stronger responses to challenging non-face images in aIT. Rather, the rapid  
516 propagation of neural signals over tens of milliseconds suggested intracortical processing within the  
517 ventral visual stream in a manner that was not entirely consistent with a pure feedforward model, even  
518 when we included strong nonlinearities in these models such as normalization and even when we  
519 stacked these operations to form more complex three stage models. However, augmenting the  
520 feedforward model so that it represented the errors generated during hierarchical processing produced  
521 the observed neural dynamics and hierarchical signal propagation (**Figures 6-7**). This view argues that  
522 many IT neurons code error signals. Using this new modeling perspective, we went on to generate  
523 predictions of previously observed IT neural phenomena (**Figure 8**).

524

### 525 **Comparison to previous neurophysiology studies in IT**

526 Our suggestion that many IT neurons code errors is consistent with the observation of strong  
527 responses to extremes in face space (Leopold, Bondar, & Giese, 2006) providing an alternative  
528 interpretation to the prior suggestion that cIT neurons are not tuned for typical faces but are instead  
529 tuned for atypical face features (i.e. extreme feature tuning) (Freiwald et al., 2009). In that prior work,  
530 the response preference of each neuron was determined by averaging over a long time window (~200  
531 ms). By looking more closely at the fine time scale dynamics of the IT response, we suggest that this  
532 same extreme coding phenomenon can instead be interpreted as a natural consequence of networks

533 that have an actual tuning preference for typical faces (as evidenced by an initial response preference  
534 for typical frontal faces in pIT, cIT, and aIT; **Figure 3B**) but that also compute error signals with respect  
535 to that preference. Under the present hypothesis, some IT neurons are preferentially tuned to typical  
536 spatial arrangements of face features, and other IT neurons are involved in coding errors with respect  
537 to those typical arrangements. We speculate that these intermixed state estimating and error coding  
538 neuron populations are both sampled in standard neural recordings of IT, even though only state  
539 estimating neurons are truly reflective of the tuning preferences of that IT processing stage. This  
540 intermixed view of IT neural signaling is further supported by recent studies demonstrating correlates of  
541 temporal prediction errors to image sequences in IT (Meyer & Olson, 2011) including the face-selective  
542 subregion of cIT (Schwiedrzik & Freiwald, 2017).

543

544 The precise fractional contribution of errors to total neural activity is difficult to estimate from our  
545 data. Under the primary image condition tested, not all sites significantly decreased their selectivity  
546 (~60% did not change their selectivity). We currently interpret these sites as coding state (feature)  
547 estimates (**Figure 3A**, light and dark gray lines in top and bottom rows, respectively), and we did  
548 observe evidence of emergence of state-like signals in our superficial neural recordings (**Figure 8C**).  
549 Alternatively, at least some of the non-reversing sites might be found to code errors under other image  
550 conditions than the one that we tested. Furthermore, while in our primary image condition selectivity  
551 decreases only accounted for ~15% of the overall spiking modulation (**Figure 6A**, data panel), larger  
552 modulations in late phase neural firing (50-100%) are possible under other image conditions (**Figure**  
553 **8A,B**). At a computational level, the absolute contribution of error signals to spiking may not be the  
554 critical factor as even a small relative contribution may have important consequences in the network.

555

### 556 **Comparison across dynamical models of neural processing**

557 Our goal was to test a range of existing recurrent models by recording neural dynamics across multiple

558 cortical stages which provided stronger constraints on computational models than fitting neural  
559 responses from only one area as in prior work (Carandini et al., 1997)(Rao & Ballard, 1999). Crucially,  
560 we found that the multi-stage neural dynamics observed in our data could not be adequately fit by only  
561 using recurrences within a stage such as adaptation, lateral inhibition, and standard forms of  
562 normalization (**Figure 6**). These results did not change when we made our simple networks more  
563 complex by adding more stages (compare **Figure 6** versus **Figure 7**) or by using more realistic model  
564 units with monotonic nonlinearities similar to a spiking nonlinearity (data not shown). Indeed, we  
565 specifically chose our stimuli to evoke similar levels of within stage neural activity to limit the effects of  
566 known mechanisms that depend on activity levels within an area (e.g. adaptation, normalization), and  
567 we fully expect that these activity dependent mechanisms would operate in parallel to top-down,  
568 recurrent processes during general visual processing. We emphasize that we only tested the standard  
569 form of normalization as originally proposed, using within stage pooling and divisive mechanisms  
570 (Carandini et al., 1997). Since that original mechanistic formulation, normalization has evolved to  
571 become a term that broadly encapsulates many forms of suppression phenomena and can include both  
572 lateral interactions within an area and feedback interactions from other areas (Nassi, Gómez-Laberge,  
573 Kreiman, & Born, 2014)(Coen-Cagli, Kohn, & Schwartz, 2015). Thus, while our results do not follow  
574 from the original mechanistic form of normalization, they may yet fall under normalization more broadly  
575 construed as a term for suppression phenomena (error coding would require a similar suppressive  
576 component). Here, we have provided a normative model for how top-down suppression would follow  
577 from the well-defined computational goals of many hierarchical neural network models.

578

### 579 **Error signals generated across different hierarchical inference and learning models**

580 The notion of error is inherent to many existing models in the literature that go beyond the basic  
581 feedforward, feature estimation class. Example models use errors for guiding top-down inference by  
582 computing errors implicitly (hierarchical Bayesian inference (Seung, 1997)(Lee & Mumford, 2003)) or by

583 representing errors explicitly (predictive coding (Rao & Ballard, 1999)). In addition, errors can be used  
584 specifically for driving unsupervised learning (autoencoder (Rifai et al., 2011)) or supervised learning  
585 (classic error backpropagation (Williams & Hinton, 1986)). Recently, models have incorporated aspects  
586 of both inference and learning (Salakhutdinov & Hinton, 2012)(Patel, Nguyen, & Baraniuk, 2015). A  
587 key, unifying feature across inference and learning models is the need to compute an error signal  
588 between processing stages. This error signal can be in the form of a generative, reconstruction cost  
589 (stage  $n$  predicting stage  $n-1$ ) or a discriminative, construction cost (stage  $n-1$  predicting stage  $n$ ).  
590 Across-stage “performance” error terms are used in all model cost functions, are typically the only term  
591 combining signals from different model stages, and are distinct from within-stage “regularization” terms  
592 (i.e. sparseness or weight decay) in driving network behavior (Marblestone, Wayne, & Kording, 2016).  
593 The present study provides evidence that such errors are not only computed, but that they are explicitly  
594 encoded in spiking rates. We emphasize that this result at the level of population dynamics was robust  
595 across choices of cost function such as those used in the literature; we tested models with different  
596 unsupervised and supervised performance errors (reconstruction, nonlinear reconstruction, and  
597 discriminative) and found similar population level error signals across these networks in the basic two-  
598 layer implementation (**Figure 7C**). Thus, errors as generally instantiated in the state-error coding  
599 hierarchical model family provide a good approximation to IT population neural dynamics.

600

### 601 **Computational utility of coding errors in addition to states**

602 In error-computing networks, errors provide control signals for guiding learning giving these networks  
603 additional adaptive power over basic feature estimation networks. This property helps augment the  
604 classical, feature coding view of neurons which, with only feature activations and Hebbian operations,  
605 does not lead to efficient learning in the manner produced by gradient descent using error  
606 backpropagation (Williams & Hinton, 1986). Observation of error signals may provide insight into how  
607 more intelligent unsupervised and supervised learning algorithms such as backpropagation could be



608 plausibly implemented in the brain. A potentially important contribution of this work is the suggestion  
609 that gradient descent algorithms are facilitated by using an error code so that efficient learning is  
610 reduced to a simple Hebbian operation at synapses and efficient inference is simply integration of  
611 inputs at the cell body (see *eqn 10* and text in **Methods**). This representational choice, to code the  
612 computational primitives of gradient descent in spiking activity, would simply leverage the existing  
613 biophysical machinery of neurons for inference and learning.

614

## 615 **MATERIALS & METHODS**

616 **Animals and surgery.** All surgery, behavioral training, imaging, and neurophysiological techniques are  
617 identical to those described in detail in previous work (Issa & DiCarlo, 2012). Two rhesus macaque  
618 monkeys (*Macaca mulatta*) weighing 6 kg (Monkey 1, female) and 7 kg (Monkey 2, male) were used. A  
619 surgery using sterile technique was performed to implant a plastic fMRI compatible headpost prior to  
620 behavioral training and scanning. Following scanning, a second surgery was performed to implant a  
621 plastic chamber positioned to allow targeting of physiological recordings to posterior, middle, and  
622 anterior face patches in both animals. All procedures were performed in compliance with National  
623 Institutes of Health guidelines and the standards of the MIT Committee on Animal Care and the  
624 American Physiological Society.

625

626 **Behavioral training and image presentation.** Subjects were trained to fixate a central white fixation  
627 dot during serial visual presentation of images at a natural saccade-driven rate (one image every 200  
628 ms). Although a 4° fixation window was enforced, subjects generally fixated a much smaller region of  
629 the image (<1°) (Issa & DiCarlo, 2012). Images were presented at a size of 6° except for control tests at  
630 3° and 12° sizes (**Figure 4C**), and all images were presented for 100 ms duration with 100 ms gap  
631 (background gray screen) between each image. Up to 15 images were presented during a single  
632 fixation trial, and the first image presentation in each trial was discarded from later analyses. Five

633 repetitions of each image in the general screen set were presented, and ten repetitions of each image  
634 were collected for all other image sets. The screen set consisted of a total of 40 images drawn from  
635 four categories (faces, bodies, objects, and places; 10 exemplars each) and was used to derive a  
636 measure of face versus non-face object selectivity. Following the screen set testing, some sites were  
637 tested using an image set containing images of face parts presented in different combinations and  
638 positions (**Figure 1B**, left panel). We first segmented the face parts (eye, nose, mouth) from a monkey  
639 face image. These parts were then blended using a Gaussian window, and the face outline was filled  
640 with pink noise to create a continuous background texture. A face part could appear on the outline at  
641 any one of nine positions on an evenly spaced 3x3 grid. Although the number of possible images is  
642 large ( $4^9 = 262,144$  images), we chose a subset of these images for testing neural sites ( $n = 82$   
643 images). Specifically, we tested the following images: the original whole face image, the noise-filled  
644 outline, the whole face reconstructed by blending the four face parts with the outline, all possible single  
645 part images where the eye, nose, or mouth could be at one of nine positions on the outline ( $n = 3 \times 9 =$   
646  $27$  images), all two part images containing a nose, mouth, left eye, or right eye at the correct outline-  
647 centered position and an eye tested at all remaining positions ( $n = 4 \times 8 - 1 = 31$  images), all two part  
648 images containing a correctly positioned contralateral eye while placing the nose or mouth at all other  
649 positions ( $n = 2 \times 8 - 2 = 14$  images), and all correctly configured faces but with one or two parts missing  
650 besides those already counted above ( $n = 4 + 3 = 7$  images). The particular two-part combinations  
651 tested were motivated by prior work demonstrating the importance of the eye in early face processing  
652 (Issa & DiCarlo, 2012), and we sought to determine how the position of the eye relative to the outline  
653 and other face parts was encoded in neural responses. The three and four part combinations were  
654 designed to manipulate the presence or absence of a face part for testing the integration of face parts,  
655 and in these images, we did not vary the positions of the parts from those in a naturally occurring face.  
656 In a follow-up test on a subset of sites, we permuted the position of the four face parts under the  
657 constraint that they still formed the configuration of a naturally occurring face (i.e. preserve the 'T'

658 configuration,  $n = 10$  images; **Figure 4B**). We tested single part images at  $3^\circ$  and  $12^\circ$  sizes in a subset  
659 of sites ( $n = 27$  images at each size; **Figure 4C**). Finally, we measured the responses to the individual  
660 face parts in the absence of the outline ( $n = 4$  images; **Figure 8A**).

661

662 **MR Imaging and neurophysiological recordings.** Both structural and functional MRI scans were  
663 collected in each monkey. Putative face patches were identified in fMRI maps of face versus non-face  
664 object selectivity in each subject. A stereo microfocal x-ray system (Cox et al., 2008) was used to guide  
665 electrode penetrations in and around the fMRI defined face-selective subregions of IT. X-ray based  
666 electrode localization was critical for making laminar assignments since electrode penetrations are  
667 often not perpendicular to the cortical lamina when taking a dorsal-ventral approach to IT face patches.  
668 Laminar assignments of recordings were made by co-registering x-ray determined electrode  
669 coordinates to MRI where the pial-to-gray matter border and the gray-to-white matter border were  
670 defined. Based on our prior work estimating sources of error (e.g. error from electrode tip localization  
671 and brain movement), registration of electrode tip locations to MRI brain volumes has a total of <400  
672 micron error which is sufficient to distinguish deep from superficial layers (Issa et al., 2013). Multi-unit  
673 activity (MUA) was systematically recorded at 300 micron intervals starting from penetration of the  
674 superior temporal sulcus such that all sites at these regular intervals were tested with a screen set  
675 containing both faces and non-face objects, and a subset of sites that were visually driven were further  
676 tested with our main image set manipulating the position of face parts. Although we did not record  
677 single-unit activity, our previous work showed similar responses between single-units and multi-units on  
678 images of the type presented here (Issa & DiCarlo, 2012), and our results are consistent with  
679 observations in previous single-unit work in IT (Freiwald et al., 2009). Recordings were made from PL,  
680 ML, and AM in the left hemisphere of monkeys 1 and 2 and additionally from AL in monkey 2. AM and  
681 AL are pooled together in our analyses forming the aIT sample while PL and ML correspond to the pIT  
682 and cIT samples, respectively.

683

684 **Neural data analysis.** The face patches were physiologically defined in the same manner as in our  
685 previous study (Issa & DiCarlo, 2012). Briefly, we fit a graded 3D sphere model (linear profile of  
686 selectivity that rises from a baseline value toward the maximum at the center of the sphere) to the  
687 spatial profile of face versus non-face object selectivity across our sites. We tested spherical regions  
688 with radii from 1.5 to 10 mm and center positions within a 5 mm radius of the fMRI-based centers of the  
689 face patches. The resulting physiologically defined regions were 1.5 to 3 mm in diameter. Sites which  
690 passed a visual response screen (mean response in a 60-160 ms window  $>2 \times \text{SEM}$  above baseline for  
691 at least one of the four categories in the screen set) were included in further analysis. All firing rates  
692 were baseline subtracted using the activity in a 25-50 ms window following image onset averaged  
693 across all repetitions of an image. Finally, given that the visual response latencies in monkey 2 were on  
694 average 13 ms slower than those in monkey 1 for corresponding face-selective regions, we applied a  
695 single latency correction (13 ms shift to align monkey 1 and monkey 2's data) prior to averaging across  
696 monkeys. This was done so as not to wash out any fine timescale dynamics by averaging. Similar  
697 results were obtained without using this latency correction as dynamics occurred at longer timescales  
698 ( $\sim 30$  ms). This single absolute adjustment was more straightforward than the site-by-site adjustment  
699 used in our previous work (Issa & DiCarlo, 2012) (though similar results were obtained using this  
700 alternative latency correction); even when each monkey was analyzed separately, we still observed pIT  
701 selectivity dynamics (**Figure 4A**). Images that produced an average population response  $\geq 0.9$  of the  
702 initial response (60-100 ms) to a face image with all face parts arranged in their typical positions in a  
703 frontal face were analyzed further (**Figures 2 and 3**). Stimulus selection was intended to limit  
704 potentially confounding differences in visual drive between image classes. In a control test, we also  
705 repeated our analysis by selecting images on a site-by-site basis where images with frontal face and  
706 non-face arrangements of parts were chosen to be within 0.75x to 1.25x of the initial response to the  
707 complete face image (minimum of five face and five non-face images in this response range for

708 inclusion of site in analysis). In follow-up analyses of population responses, we specifically limited  
709 comparison to images with the same number of parts (**Figure 4B,C**). For example, for single part  
710 images, we used the image with the eye in the upper, contralateral region of the outline as a reference  
711 requiring a response  $\geq 0.9$  of the initial population response to this reference for inclusion of the images  
712 in this analysis. We found that four other images of the 27 single-part images elicited a response at  
713 least as large as 90% of the response to this standard image. For images containing all four face parts,  
714 we used the complete, frontal face as the standard and found non-face arrangements of the four face  
715 parts that drove at least 90% of the early response to the whole face (2 images out of 10 tested). To  
716 compute individual site  $d'$  for each of these stimulus partitions (e.g. typical versus atypical  
717 arrangements of 1 face part), we combined all presentations of images with frontal face arrangements  
718 and compared these responses to responses from all presentations of images with non-face  
719 arrangements using  $d' = (u_1 - u_2) / ((\text{var}_1 + \text{var}_2) / 2)^{1/2}$  where variance was computed across all trials for that  
720 image class (e.g. all presentations of all typical face images); this was identical to the  $d'$  measure used  
721 in previous work for computing selectivity for faces versus non-face objects (Aparicio, Issa, & DiCarlo,  
722 2016; Ohayon, Freiwald, & Tsao, 2012). For example, for the main image set (**Figure 2A**), we  
723 compared all presentations of frontal face arrangements (8 images x 10 presentations/image = 80 total  
724 presentations) to all presentations of non-face arrangements (13 images x 10 presentations/image =  
725 130 total presentations) to compute the  $d'$  values for each site in two time windows (60-90 ms and 100-  
726 130 ms) as shown in **Figure 3A**. A positive  $d'$  implies a stronger response to more naturally occurring  
727 frontal face arrangements of face parts while a negative  $d'$  indicates a preference for unnatural non-  
728 face arrangements of the face parts.

729

### 730 **Dynamical models**

731 *Modeling framework and equations.* To model the dynamics of neural response rates in a hierarchy, we  
732 start with the simplest possible model that might capture those dynamics: a model architecture

733 consisting of a hidden stage of processing containing two units that linearly converge onto a single  
734 output unit. We use this two-stage cascade for illustration of the basic concepts which can be easily  
735 extended to longer cascades with additional stages, and we ultimately used a three-stage version of the  
736 model to fit our neural data collected from three cortical stages (**Figures 5B & 6**).

737 An external input is applied separately to each hidden stage unit, which can be viewed as  
738 representing different features for downstream integration. We vary the connections between the two  
739 hidden units within the hidden processing stage (lateral connections) or between hidden and output  
740 stage units (feedforward and feedback connections) to instantiate different model families. The details  
741 of the different architectures specified by each model class can be visualized by their equivalent neural  
742 network diagrams (**Figure 5**). Here, we provide a basic description for each model tested. All two-stage  
743 models utilized a 2x2 feedforward identity matrix  $A$  that simply transfers inputs  $\mathbf{u}$  (2x1) to hidden layer  
744 units  $\mathbf{x}$  (2x1) and a 1x2 feedforward vector  $B$  that integrates hidden layer activations  $\mathbf{x}$  into a single  
745 output unit  $y$ .

746

$$747 \quad A = aI, \quad B = b[1, 1] \quad (1)$$

748

749 By simply substituting in the appropriate unit vector and weight matrix transforming inputs from one  
750 layer to the next for the desired network architecture, this simple two-stage architecture can be  
751 extended to larger networks (e.g. see three-stage network diagrams in **Figure 5B**). To generate  
752 dynamics in the simple networks below, we assumed that neurons act as leaky integrators of their total  
753 synaptic input, a standard rate-based model of a neuron used in previous work (Seung, 1997) (Rao &  
754 Ballard, 1999).

755

756 *Pure feedforward.* In the purely feedforward family, connections are exclusively from hidden to output

757 stages through feedforward matrices  $A$  and  $B$ .

758

$$759 \quad \dot{\mathbf{x}} = A\mathbf{u} - \mathbf{x}/\tau \quad \dot{y} = B\mathbf{x} - y/\tau \quad (2)$$

760

761 where  $\tau$  is the time constant of the leak current which can be seen as reflecting the biophysical  
762 limitations of neurons (a perfect integrator with large  $\tau$  would have almost no leak and hence infinite  
763 memory).

764

765 *Lateral inhibition.* Lateral connections (matrix with off-diagonal terms) are included and are inhibitory.

766 The scalar  $k_l$  sets the relative strength of lateral inhibition versus bottom-up input.

767

$$768 \quad \dot{\mathbf{x}} = A\mathbf{u} - \begin{bmatrix} 0 & k_l \\ k_l & 0 \end{bmatrix} \mathbf{x} - \mathbf{x}/\tau \quad \dot{y} = B\mathbf{x} - y/\tau \quad (3)$$

769

770 *Normalization.* An inhibitory term that scales with the summed activity of units within a stage is

771 included. The scalar  $k_s$  sets the relative strength of normalization versus bottom-up input.

772

$$773 \quad \dot{\mathbf{x}} = A\mathbf{u} - k_s \sum x \cdot \mathbf{x} - \mathbf{x}/\tau \quad \dot{y} = B\mathbf{x} - k_s y \cdot y - y/\tau \quad (4)$$

774

775 *Normalization (nonlinear)* (Carandini et al., 1997). The summed activity of units within a stage is used to  
776 nonlinearly scale shunting inhibition.

777

$$778 \quad \dot{\mathbf{x}} = A\mathbf{u} - \frac{\mathbf{x}}{\tau \sqrt{1 - k_s \sum x}} \quad \dot{y} = B\mathbf{x} - \frac{y}{\tau \sqrt{1 - k_s y}} \quad (5)$$

779

780 Note that this is technically a nonlinear dynamical system, and since the normalization term in equation  
781 (5) is not continuously differentiable, we used the fourth-order Taylor approximation around zero in the  
782 simulations of equation (5).

783

784 *Feedback (linear reconstruction)*. The feedback-based model is derived using a normative framework  
785 that performs optimal inference in the linear case (Seung, 1997) (unlike the networks in equations (2)-  
786 (5) which are motivated from a mechanistic perspective but do not directly optimize a squared error  
787 performance loss). The feedback network minimizes the cost  $C$  of reconstructing the inputs of each  
788 stage (i.e. mean squared error of layer  $n$  predicting layer  $n-1$ ).

789

$$790 \quad C = \frac{1}{2} (\mathbf{u} - A^T \mathbf{x})^2 + \frac{1}{2} (\mathbf{x} - B^T \mathbf{y})^2 \quad (6)$$

791

792 Differentiating this coding cost with respect to the encoding variables in each layer  $\mathbf{x}$ ,  $\mathbf{y}$  yields:

793

$$794 \quad \frac{\partial C}{\partial \mathbf{x}} = -A(\mathbf{u} - A^T \mathbf{x}) + (\mathbf{x} - B^T \mathbf{y}) \quad \frac{\partial C}{\partial \mathbf{y}} = -B(\mathbf{x} - B^T \mathbf{y}) \quad (7)$$

795

796 The cost function  $C$  can be minimized by descending these gradients over time to optimize the values  
797 of  $\mathbf{x}$  and  $\mathbf{y}$ .

798

$$799 \quad \frac{d\mathbf{x}}{dt} = -\frac{\partial C}{\partial \mathbf{x}} = A(\mathbf{u} - A^T \mathbf{x}) - (\mathbf{x} - B^T \mathbf{y}) - \mathbf{x}/\tau \quad (8)$$

800



801 
$$\frac{d\mathbf{y}}{dt} = -\frac{\partial C}{\partial \mathbf{y}} = B(\mathbf{x} - B^T \mathbf{y}) - \mathbf{y}/\tau$$

802

803 The above dynamical equations are equivalent to a linear network with a connection matrix containing  
804 symmetric feedforward ( $B$ ) and feedback ( $B^T$ ) weights between stages  $\mathbf{x}$  and  $\mathbf{y}$  as well as within-stage  
805 pooling followed by recurrent inhibition ( $-AA^T \mathbf{x}$  and  $-BB^T \mathbf{y}$ ) that resembles normalization. The property  
806 that symmetric connections minimize the cost function  $C$  generalizes to a feedforward network of any  
807 size or number of hidden processing stages (i.e. holds for arbitrary lower triangular network connection  
808 matrix). The final activation states ( $\mathbf{x}, \mathbf{y}$ ) of the hierarchical generative network are optimal in the sense  
809 that the bottom-up activations (implemented through feedforward connections) are balanced by the top-  
810 down expectations (implemented by feedback connections) which is equivalent to a Bayesian network  
811 combining bottom-up likelihoods with top-down priors to compute the maximum *a posteriori* (MAP)  
812 estimate. Here, the priors are embedded in the weight structure of the network. In simulations, we  
813 include an additional scalar  $k_{td}$  that sets the relative weighting of bottom-up versus top-down signals.

814

815 
$$\dot{\mathbf{x}} = A(\mathbf{u} - A^T \mathbf{x}) - k_{td}(\mathbf{x} - B^T \mathbf{y}) - \mathbf{x}/\tau \quad (9)$$

816

817 *Error signals computed in the feedback model.* In equation (9), inference can be thought of as  
818 proceeding through integration of inputs on the dendrites of neuron population  $\mathbf{x}$ . In this scenario, all  
819 computations are implicit in dendritic integration. Alternatively, the computations in equation (9) can be  
820 done in two steps where, in the first step, reconstruction errors are computed (i.e.  $\mathbf{e}_0 = \mathbf{u} - A^T \mathbf{x}$ ,  $\mathbf{e}_1 = \mathbf{x} -$   
821  $B^T \mathbf{y}$ ) and explicitly represented in a separate error coding population. These error signals can then be  
822 integrated by their downstream target population to generate the requisite update to the state signal of  
823 neuron population  $\mathbf{x}$ .

824

825  $\dot{\mathbf{x}} = A\mathbf{e}_0 - k_{td}\mathbf{e}_1 - \mathbf{x}/\tau$   $\dot{y} = B\mathbf{e}_1 - y/\tau$  (10)

826

827 An advantage of this strategy is that the a state unit now directly receives errors as inputs, and those  
828 inputs allow implementation of an efficient Hebbian rule for learning weight matrices (Rao & Ballard,  
829 1999) -- the gradient rule for learning is simply a product of the state activation and the input error  
830 activation (weight updates obtained by differentiating equation (6) with respect to weight matrices  $A$  and  
831  $B$ :  $\Delta A = \mathbf{x} \cdot \mathbf{e}_0^T$ ,  $\Delta A^T = \mathbf{e}_0 \cdot \mathbf{x}^T$ ,  $\Delta B = y \cdot \mathbf{e}_1^T$ , and  $\Delta B^T = \mathbf{e}_1 \cdot y$ ). Thus, the reconstruction errors serve as  
832 computational intermediates for both the gradients of online inference mediated by dendritic integration  
833 (dynamics in state space, equation (10)) and gradients for offline learning mediated by Hebbian  
834 plasticity (dynamics in weight space).

835

836 In order for the reconstruction errors at each layer to be scaled appropriately in the feedback  
837 model, we invoke an additional downstream variable  $z$  to predict activity at the top stage such that,  
838 instead of  $\mathbf{e}_2 = y$  which scales as a state variable, we have  $\mathbf{e}_2 = y \cdot C^T z$  (**Figure 5A**). This overall model  
839 reflects a state and error coding model as opposed to a state only model.

840

841 *Feedback (three-stage)*. For the simulations in **Figures 6 and 8**, three-stage versions of the above  
842 equations were used. These deeper networks were also wider such that they began with four input  
843 units ( $\mathbf{u}$ ) instead of only two inputs in the two-stage models. These inputs converged through  
844 successive processing stages ( $\mathbf{w}, \mathbf{x}, \mathbf{y}$ ) to one unit at the top node ( $\mathbf{z}$ ) (**Figure 5B**).

845

846 *Feedback (nonlinear reconstruction)*. To test the generality of our findings beyond a linear  
847 reconstruction cost, we simulated feedback-based models which optimized different candidate cost  
848 functions proposed for the ventral stream (**Figure 7C**). In nonlinear hierarchical inference,

849 reconstruction is performed using a monotonic nonlinearity with a threshold ( $th$ ) and bias ( $bi$ ):

850

$$851 \quad C = \frac{1}{2} (\mathbf{u} - f(A^T \mathbf{x}))^2 + \frac{1}{2} (\mathbf{x} - f(B^T \mathbf{y}))^2, \quad \text{where } f(x) = \tanh(x - th) + bi \quad (11)$$

852

$$853 \quad \dot{\mathbf{x}} = A(\mathbf{u} - f(A^T \mathbf{x}))(1 - \tanh(A^T \mathbf{x} - th)^2) - k_{td}(\mathbf{x} - f(B^T \mathbf{y})) - \mathbf{x}/\tau$$

854 (12)

$$855 \quad \dot{\mathbf{y}} = B(\mathbf{x} - f(B^T \mathbf{y}))(1 - \tanh(B^T \mathbf{y} - th)^2) - \mathbf{y}/\tau$$

856

857 *Feedback (linear construction).* Instead of a reconstruction cost where responses match the input (i.e.  
 858 generative model) as in unsupervised learning, we additionally simulated the states and errors in a  
 859 feedback network minimizing a linear construction cost where the network is producing responses to  
 860 match a given output (i.e. discriminative model) similar to supervised learning:

861

$$862 \quad C = \frac{1}{2} (A\mathbf{u} - \mathbf{x})^2 + \frac{1}{2} (B\mathbf{x} - \mathbf{y})^2 \quad (13)$$

863

$$864 \quad \dot{\mathbf{x}} = (A\mathbf{u} - \mathbf{x}) - k_{td}B^T(B\mathbf{x} - \mathbf{y}) - \mathbf{x}/\tau \quad \dot{\mathbf{y}} = (B\mathbf{x} - \mathbf{y}) - \mathbf{y}/\tau \quad (14)$$

865

866 **Model simulation.** To simulate the dynamical systems in equations (2)-(14), a step input  $\mathbf{u}$  was  
 867 applied. This input was smoothed using a Gaussian kernel to approximate the lowpass nature of signal  
 868 propagation in the series of processing stages from the retina to pIT:

869

$$870 \quad \mathbf{u}(t) = \frac{1}{\sqrt{2\pi\sigma^2}} e^{-\frac{(t-t_0)^2}{2\sigma^2}} * \mathbf{h}(t) \Rightarrow \dot{\mathbf{u}} = \frac{1}{\sqrt{2\pi\sigma^2}} e^{-\frac{(t-t_0)^2}{2\sigma^2}} \cdot \mathbf{h} \quad (15)$$

871

872 where the elements of  $\mathbf{h}$  are scaled Heaviside step functions. The input is thus a sigmoidal ramp whose  
873 latency to half height is set by  $t_0$  and rise time is set by  $\sigma$ . For simulation of two-stage models, there  
874 were ten basic parameters: latency of the input  $t_0$ , standard deviation of the Gaussian ramp  $\sigma$ , system  
875 time constant  $\tau$ , input connection strength  $a$ , feedforward connection strength  $b$ , the four input values  
876 across two stimulus conditions (i.e.  $h_{11}$ ,  $h_{12}$ ,  $h_{21}$ ,  $h_{22}$ ), and a factor  $sc$  for scaling the final output to the  
877 neural activity. In the deeper three-stage network, there were a total of fifteen parameters which  
878 included an additional feedforward connection strength  $c$  and additional input values since the three-  
879 stage model had four inputs instead of two. The lateral inhibition model class required one additional  
880 parameter  $k_l$  as did the normalization model family  $k_s$ , and for feedback model simulations, there was  
881 an additional feedback weight  $k_{fd}$  to scale the relative contribution of the top-down errors in driving  
882 online inference. For the error coding variants of the feedback model, gain parameters  $c$  (two-stage)  
883 and  $d$  (three-stage) were included to scale the overall magnitude of the top level reconstruction error  
884 (also see **Figure 5** for locations of parameters in network diagrams).

885

886 **Model parameter fits to neural data.** In fitting the models to the observed neural dynamics, we  
887 mapped the summed activity in the hidden stage ( $\mathbf{w}$ ) to population averaged activity in pIT, and we  
888 mapped the summed activity in the output stage ( $\mathbf{y}$ ) to population averaged signals measured in aIT. To  
889 simulate error coding, we mapped the reconstruction errors  $\mathbf{e}_1 = \mathbf{w} - \mathbf{B}^T \mathbf{x}$  and  $\mathbf{e}_3 = \mathbf{y} - \mathbf{C}^T \mathbf{z}$  to activity in pIT  
890 and aIT, respectively. We applied a squaring nonlinearity to the model outputs as an approximation to  
891 rectification since recorded extracellular firing rates are non-negative (and linear rectification is not  
892 continuously differentiable). Analytically solving this system of dynamical equations (2)-(14) for a step  
893 input is precluded because of the higher order interaction terms (the roots of the determinant and hence  
894 the eigenvalues/eigenvectors of a 3x3 or larger matrix are not analytically determined, except for the  
895 purely feedforward model which only has first-order interactions), and in the case of the normalization

896 models, there is an additional nonlinear dependence on the shunt term. Thus, we relied on  
897 computational methods (constrained nonlinear optimization) to fit the parameters of the dynamical  
898 systems to the neural data with a quadratic (sum of squares) loss function.

899

900 Parameter values were fit in a two-step procedure. In the first step, we fit only the difference in  
901 response between image classes (differential mode which is the selectivity profile over time, see **Figure**  
902 **6A**, right data panel), and in the second step, we refined fits to capture an equally weighted average of  
903 the differential mode and the common mode (the common mode is the average across images of the  
904 response time course of visual drive). This two-step procedure was used to ensure that each model  
905 had the best chance of fitting the dynamics of selectivity (differential mode) as these selectivity profiles  
906 were the main phenomena of interest but were smaller in size (20% of response) compared to overall  
907 visual drive. In each step, fits were done using a large-scale algorithm (interior-point) to optimize  
908 coarsely, and the resulting solution was used as the initial condition for a medium-scale algorithm  
909 (sequential quadratic programming) for additional refinement. The lower and upper parameter bounds  
910 tested were:  $t_0=[50\ 70]$ ,  $\sigma=[0.5\ 25]$ ,  $\tau=[0.5\ 1000]$ ,  $k_i, k_s, k_{\sigma}=[0\ 1]$ ,  $a, b, c, d=[0\ 2]$ ,  $h=[0\ 20]$ ,  $sc=[0\ 100]$ ,  $th=[-$   
911  $20\ 20]$ , and  $bi=[-1\ 1]$  which proved to be adequately liberal as parameter values converged to values  
912 that did not generally approach these boundaries. To avoid local minima, the algorithm was initialized to  
913 a number of randomly selected points ( $n = 50$ ), and after fitting the differential mode, we took the top  
914 fits ( $n = 25$ ) for each model class and used these as initializations in subsequent steps. The single best  
915 fitting instance of each model class is shown in the main figures.

916

917 **Model predictions.** For the predictions in **Figure 8**, all architectural parameters obtained by the fitting  
918 procedure above were held fixed; only the pattern of inputs to the network was varied. For **Figure 8A**,  
919 to test the input integration properties of a model, we used the top-performing model and compared the  
920 response to all inputs presented simultaneously with the sum of the responses to each input alone.

921

922 For **Figure 8B**, we approximated novel versus familiar images by parametrically varying the  
923 degree to which input patterns were random (inputs drawn from i.i.d. uniform distributions on the  
924 interval [0,1]) versus structured in a way that matched the weight pattern of the network. Here, we used  
925 a version of the model with two independent outputs reflecting detectors for two familiarized input  
926 patterns (output 1 tuned to pattern A:  $u_1, u_2, u_3, u_4$  active and output 2 tuned to pattern B:  $u_5, u_6, u_7, u_8$   
927 active) (**Figure 8B**). Alternating between these two input patterns simulates alternation of two  
928 familiarized (learned) images as compared to purely random patterns ( $u_{1-8}$  independent and identically  
929 distributed). The first-to-second layer weights were [1,1,1,1,0,0,0,0] for pattern A and [0,0,0,0,1,1,1,1]  
930 for pattern B, so to parametrically vary the degree of correlation of inputs to this weight pattern from  
931 random (correlation = 0) to deterministic (correlation = 1), we drew input values from a joint distribution  
932  $P(u_1, u_2, u_3, u_4, u_5, u_6, u_7, u_8)$  where  $u_{1-4}$  were drawn from a high-valued uniform distribution on the interval  
933  $[1-\varepsilon, 1]$  and  $u_{5-8}$  were drawn from a low-valued uniform distribution  $[0, \varepsilon]$  for stimulus pattern A and the  
934 opposite for pattern B ( $u_{5-8}$  high-valued and  $u_{1-4}$  low-valued). The parameter  $\varepsilon$  determines the range of  
935 values that could be drawn from purely deterministic (0 or 1,  $\varepsilon = 0$ ) to randomly uniformly distributed  
936 (from 0 to 1,  $\varepsilon = 1$ ). Thus, the correlation of the inputs correspondingly varies according to  $\rho(u_i, u_j)$   
937  $= \rho(u_k, u_l) = (\varepsilon-1)^2 / ((\varepsilon-1)^2 + \varepsilon^2 / 3)$  where  $1 \leq i, j \leq 4, i \neq j$  and  $5 \leq k, l \leq 8, k \neq l$  approaching correlation equal to 0 for a  
938 purely, random pattern ( $\varepsilon = 1$ ) that had a low probability of matching the learned patterns A and B.

939

940 **Code availability.** All data analysis and computational modeling were done using custom scripts  
941 written in Matlab. All code is available upon request.

942

943 **Statistics.** Error bars represent standard errors of the mean obtained by bootstrap resampling ( $n =$   
944 1000). All statistical comparisons including those of means or correlation values were obtained by

945 bootstrap resampling ( $n = 1000$ ) producing p-values at a resolution of 0.001 so that the lowest p-value  
946 that can be reported is  $p = 0.000$  given the resolution of this statistical analysis. All statistical tests were  
947 two-sided unless otherwise specified. Spearman's rank correlation coefficient was used.

948

949 **ACKNOWLEDGEMENTS**

950 We thank J. Deutsch, K. Schmidt, and P. Aparicio for help with MRI and animal care and B. Andken  
951 and C. Stawarz for help with experiment software. We are grateful to T. Meyer and C. Olson for sharing  
952 figures from their published work.

953 **REFERENCES**

954

955 Ackley, D. H., Hinton, G. E., & Sejnowski, T. J. (1985). A learning algorithm for boltzmann machines.  
956 *Cognitive Science*, 9(1), 147–169. [https://doi.org/10.1016/S0364-0213\(85\)80012-4](https://doi.org/10.1016/S0364-0213(85)80012-4)

957

958 Afraz, S.-R., Kiani, R., & Esteky, H. (2006). Microstimulation of inferotemporal cortex influences face  
959 categorization. *Nature*, 442(7103), 692–695. <https://doi.org/10.1038/nature04982>

960

961 Aparicio, P. L., Issa, E. B., & DiCarlo, J. J. (2016). Neurophysiological Organization of the Middle Face  
962 Patch in Macaque Inferior Temporal Cortex. *Journal of Neuroscience*, 36(50), 12729–12745.  
963 <https://doi.org/10.1523/JNEUROSCI.0237-16.2016>

964

965 Brincat, S. L., & Connor, C. E. (2006). Dynamic Shape Synthesis in Posterior Inferotemporal Cortex.  
966 *Neuron*, 49(1), 17–24. <https://doi.org/10.1016/j.neuron.2005.11.026>

967

968 Cadieu, C. F., Hong, H., Yamins, D. L. K., Pinto, N., Ardila, D., Solomon, E. A., ... DiCarlo, J. J. (2014). Deep  
969 Neural Networks Rival the Representation of Primate IT Cortex for Core Visual Object  
970 Recognition. *PLoS Comput Biol*, 10(12), e1003963.  
971 <https://doi.org/10.1371/journal.pcbi.1003963>

972

973 Carandini, M., & Heeger, D. J. (2012). Normalization as a canonical neural computation. *Nature Reviews*  
974 *Neuroscience*, 13(1), 51–62. <https://doi.org/10.1038/nrn3136>

975

976 Carandini, M., Heeger, D. J., & Movshon, J. A. (1997). Linearity and Normalization in Simple Cells of the  
977 Macaque Primary Visual Cortex. *The Journal of Neuroscience*, 17(21), 8621–8644.

978

979 Chang, L., & Tsao, D. Y. (2017). The Code for Facial Identity in the Primate Brain. *Cell*, 169(6), 1013-  
980 1028.e14. <https://doi.org/10.1016/j.cell.2017.05.011>

981

982 Chen, M., Yan, Y., Gong, X., Gilbert, C. D., Liang, H., & Li, W. (2014). Incremental Integration of Global  
983 Contours through Interplay between Visual Cortical Areas. *Neuron*, 82(3), 682–694.  
984 <https://doi.org/10.1016/j.neuron.2014.03.023>

985

986 Coen-Cagli, R., Kohn, A., & Schwartz, O. (2015). Flexible gating of contextual influences in natural  
987 vision. *Nature Neuroscience*, 18(11), 1648–1655. <https://doi.org/10.1038/nn.4128>

988

989 Cox, D. D., Papanastassiou, A. M., Oreper, D., Andken, B. B., & DiCarlo, J. J. (2008). High-Resolution  
990 Three-Dimensional Microelectrode Brain Mapping Using Stereo Microfocal X-ray Imaging.  
991 *Journal of Neurophysiology*, 100(5), 2966–2976. <https://doi.org/10.1152/jn.90672.2008>

992

993 Egeth, H. E., & Yantis, and S. (1997). VISUAL ATTENTION: Control, Representation, and Time Course.  
994 *Annual Review of Psychology*, 48(1), 269–297. <https://doi.org/10.1146/annurev.psych.48.1.269>

995



- 996 Epshtein, B., Lifshitz, I., & Ullman, S. (2008). Image interpretation by a single bottom-up top-down  
997 cycle. *Proceedings of the National Academy of Sciences*, *105*(38), 14298–14303.  
998 <https://doi.org/10.1073/pnas.0800968105>  
999
- 1000 Freedman, D. J., Riesenhuber, M., Poggio, T., & Miller, E. K. (2006). Experience-Dependent Sharpening  
1001 of Visual Shape Selectivity in Inferior Temporal Cortex. *Cerebral Cortex*, *16*(11), 1631–1644.  
1002 <https://doi.org/10.1093/cercor/bhj100>  
1003
- 1004 Freiwald, W. A., & Tsao, D. Y. (2010). Functional Compartmentalization and Viewpoint Generalization  
1005 Within the Macaque Face-Processing System. *Science*, *330*(6005), 845–851.  
1006 <https://doi.org/10.1126/science.1194908>  
1007
- 1008 Freiwald, W. A., Tsao, D. Y., & Livingstone, M. S. (2009). A face feature space in the macaque temporal  
1009 lobe. *Nature Neuroscience*, *12*(9), 1187–1196. <https://doi.org/10.1038/nn.2363>  
1010
- 1011 Friston, K., & Kiebel, S. (2009). Cortical circuits for perceptual inference. *Neural Networks*, *22*(8), 1093–  
1012 1104. <https://doi.org/10.1016/j.neunet.2009.07.023>  
1013
- 1014 Grimaldi, P., Saleem, K. S., & Tsao, D. (2016). Anatomical Connections of the Functionally Defined “Face  
1015 Patches” in the Macaque Monkey. *Neuron*, *90*(6), 1325–1342.  
1016 <https://doi.org/10.1016/j.neuron.2016.05.009>  
1017
- 1018 Hung, C. P., Kreiman, G., Poggio, T., & DiCarlo, J. J. (2005). Fast Readout of Object Identity from  
1019 Macaque Inferior Temporal Cortex. *Science*, *310*(5749), 863–866.  
1020 <https://doi.org/10.1126/science.1117593>  
1021
- 1022 Hyvärinen, A., Hurri, J., & Hoyer, P. O. (2009). Lateral interactions and feedback. In *Natural Image*  
1023 *Statistics: A Probabilistic Approach to Early Computational Vision*. (Vol. 39, pp. 307–318).  
1024 Springer Science & Business Media.  
1025
- 1026 Issa, E. B., & DiCarlo, J. J. (2012). Precedence of the Eye Region in Neural Processing of Faces. *The*  
1027 *Journal of Neuroscience*, *32*(47), 16666–16682. [https://doi.org/10.1523/JNEUROSCI.2391-](https://doi.org/10.1523/JNEUROSCI.2391-12.2012)  
1028 [12.2012](https://doi.org/10.1523/JNEUROSCI.2391-12.2012)
- 1029 Issa, E. B., Papanastassiou, A. M., Andken, B. B., & DiCarlo, J. J. (2010). Towards large-scale, high  
1030 resolution maps of object selectivity in inferior temporal cortex. Presented at the  
1031 Computational and Systems Neuroscience, Salt Lake City, UT: Front in Neuroscienc Abstract.  
1032 <https://doi.org/10.3389/conf.fnins.2010.03.00154>  
1033
- 1034 Issa, E. B., Papanastassiou, A. M., & DiCarlo, J. J. (2013). Large-Scale, High-Resolution  
1035 Neurophysiological Maps Underlying fMRI of Macaque Temporal Lobe. *The Journal of*  
1036 *Neuroscience*, *33*(38), 15207–15219. <https://doi.org/10.1523/JNEUROSCI.1248-13.2013>  
1037
- 1038 Krizhevsky, A., Sutskever, I., & Hinton, G. E. (2012). ImageNet Classification with Deep Convolutional  
1039 Neural Networks. In *Advances in Neural Information Processing Systems* (pp. 1106–1114).

1040

1041 Lee, T. S., & Mumford, D. (2003). Hierarchical Bayesian inference in the visual cortex. *Journal of the*  
1042 *Optical Society of America A*, 20(7), 1434. <https://doi.org/10.1364/JOSAA.20.001434>

1043

1044 Lee, T. S., Yang, C. F., Romero, R. D., & Mumford, D. (2002). Neural activity in early visual cortex reflects  
1045 behavioral experience and higher-order perceptual saliency. *Nature Neuroscience*, 5(6), 589–  
1046 597. <https://doi.org/10.1038/nn0602-860>

1047

1048 Leopold, D. A., Bondar, I. V., & Giese, M. A. (2006). Norm-based face encoding by single neurons in the  
1049 monkey inferotemporal cortex. *Nature*, 442(7102), 572–575.  
1050 <https://doi.org/10.1038/nature04951>

1051

1052 Majaj, N. J., Hong, H., Solomon, E. A., & DiCarlo, J. J. (2015). Simple Learned Weighted Sums of Inferior  
1053 Temporal Neuronal Firing Rates Accurately Predict Human Core Object Recognition  
1054 Performance. *The Journal of Neuroscience*, 35(39), 13402–13418.  
1055 <https://doi.org/10.1523/JNEUROSCI.5181-14.2015>

1056

1057 Marblestone, A. H., Wayne, G., & Kording, K. P. (2016). Toward an Integration of Deep Learning and  
1058 Neuroscience. *Frontiers in Computational Neuroscience*, 10.  
1059 <https://doi.org/10.3389/fncom.2016.00094>

1060

1061 Meyer, T., & Olson, C. R. (2011). Statistical learning of visual transitions in monkey inferotemporal  
1062 cortex. *Proceedings of the National Academy of Sciences*, 108(48), 19401–19406.  
1063 <https://doi.org/10.1073/pnas.1112895108>

1064

1065 Meyer, T., Walker, C., Cho, R. Y., & Olson, C. R. (2014). Image familiarization sharpens response  
1066 dynamics of neurons in inferotemporal cortex. *Nature Neuroscience*, 17(10), 1388–1394.  
1067 <https://doi.org/10.1038/nn.3794>

1068

1069 Meyers, E. M., Borzello, M., Freiwald, W. A., & Tsao, D. (2015). Intelligent Information Loss: The Coding  
1070 of Facial Identity, Head Pose, and Non-Face Information in the Macaque Face Patch System. *The*  
1071 *Journal of Neuroscience*, 35(18), 7069–7081. <https://doi.org/10.1523/JNEUROSCI.3086-14.2015>

1072

1073 Moeller, S., Crago, T., Chang, L., & Tsao, D. Y. (2017). The effect of face patch microstimulation on  
1074 perception of faces and objects. *Nature Neuroscience, advance online publication*.  
1075 <https://doi.org/10.1038/nn.4527>

1076

1077 Moeller, S., Freiwald, W. A., & Tsao, D. Y. (2008). Patches with Links: A Unified System for Processing  
1078 Faces in the Macaque Temporal Lobe. *Science*, 320(5881), 1355–1359.  
1079 <https://doi.org/10.1126/science.1157436>

1080

1081 Murray, E. A., Bussey, T. J., & Saksida, L. M. (2007). Visual Perception and Memory: A New View of  
1082 Medial Temporal Lobe Function in Primates and Rodents. *Annual Review of Neuroscience*,  
1083 30(1), 99–122. <https://doi.org/10.1146/annurev.neuro.29.051605.113046>

1084

1085 Nassi, J. J., Gómez-Laberge, C., Kreiman, G., & Born, R. T. (2014). Corticocortical feedback increases the  
1086 spatial extent of normalization. *Frontiers in Systems Neuroscience*, *8*.  
1087 <https://doi.org/10.3389/fnsys.2014.00105>

1088

1089 Ohayon, S., Freiwald, W. A., & Tsao, D. Y. (2012). What Makes a Cell Face Selective? The Importance of  
1090 Contrast. *Neuron*, *74*(3), 567–581. <https://doi.org/10.1016/j.neuron.2012.03.024>

1091

1092 Olshausen, B. A., & Field, D. J. (1996). Emergence of simple-cell receptive field properties by learning a  
1093 sparse code for natural images. *Nature*, *381*(6583), 607–609.  
1094 <https://doi.org/10.1038/381607a0>

1095

1096 Patel, A. B., Nguyen, T., & Baraniuk, R. G. (2015). A Probabilistic Theory of Deep Learning.  
1097 *ArXiv:1504.00641 [Cs, Stat]*. Retrieved from <http://arxiv.org/abs/1504.00641>

1098

1099 Rao, R. P. N., & Ballard, D. H. (1999). Predictive coding in the visual cortex: a functional interpretation  
1100 of some extra-classical receptive-field effects. *Nature Neuroscience*, *2*(1), 79–87.  
1101 <https://doi.org/10.1038/4580>

1102

1103 Rifai, S., Vincent, P., Muller, X., Glorot, X., & Bengio, Y. (2011). Contractive auto-encoders: Explicit  
1104 invariance during feature extraction. In *Proceedings of the 28th international conference on*  
1105 *machine learning (ICML-11)* (pp. 833–840).

1106

1107 Sadagopan, S., Zarco, W., & Freiwald, W. A. (2017). A causal relationship between face-patch activity  
1108 and face-detection behavior. *eLife*, *6*, e18558. <https://doi.org/10.7554/eLife.18558>

1109

1110 Salakhutdinov, R., & Hinton, G. (2012). An Efficient Learning Procedure for Deep Boltzmann Machines.  
1111 *Neural Computation*, *24*(8), 1967–2006. [https://doi.org/10.1162/NECO\\_a\\_00311](https://doi.org/10.1162/NECO_a_00311)

1112

1113 Schwartz, O., & Simoncelli, E. P. (2001). Natural signal statistics and sensory gain control. *Nature*  
1114 *Neuroscience*, *4*(8), 819–825. <https://doi.org/10.1038/90526>

1115

1116 Schwiedrzik, C. M., & Freiwald, W. A. (2017). High-Level Prediction Signals in a Low-Level Area of the  
1117 Macaque Face-Processing Hierarchy. *Neuron*, *96*(1), 89–97.e4.  
1118 <https://doi.org/10.1016/j.neuron.2017.09.007>

1119

1120 Seung, H. S. (1997). Pattern analysis and synthesis in attractor neural networks. *Theoretical Aspects of*  
1121 *Neural Computation: A Multidisciplinary Perspective*, Singapore.

1122

1123 Sugase, Y., Yamane, S., Ueno, S., & Kawano, K. (1999). Global and fine information coded by single  
1124 neurons in the temporal visual cortex. *Nature*, *400*(6747), 869–873.  
1125 <https://doi.org/10.1038/23703>

1126

- 1127 Tsao, D. Y., Freiwald, W. A., Tootell, R. B. H., & Livingstone, M. S. (2006). A Cortical Region Consisting  
1128 Entirely of Face-Selective Cells. *Science*, *311*(5761), 670–674.  
1129 <https://doi.org/10.1126/science.1119983>  
1130
- 1131 Tsao, D. Y., Moeller, S., & Freiwald, W. A. (2008). Comparing face patch systems in macaques and  
1132 humans. *Proceedings of the National Academy of Sciences*, *105*(49), 19514–19519.  
1133 <https://doi.org/10.1073/pnas.0809662105>  
1134
- 1135 Williams, D. R. G. H. R., & Hinton, G. E. (1986). Learning representations by back-propagating errors.  
1136 *Nature*, *323*, 533–536.  
1137
- 1138 Woloszyn, L., & Sheinberg, D. L. (2012). Effects of Long-Term Visual Experience on Responses of  
1139 Distinct Classes of Single Units in Inferior Temporal Cortex. *Neuron*, *74*(1), 193–205.  
1140 <https://doi.org/10.1016/j.neuron.2012.01.032>  
1141
- 1142 Yamins, D. L. K., Hong, H., Cadieu, C. F., Solomon, E. A., Seibert, D., & DiCarlo, J. J. (2014). Performance-  
1143 optimized hierarchical models predict neural responses in higher visual cortex. *Proceedings of*  
1144 *the National Academy of Sciences*, *111*(23), 8619–8624.  
1145 <https://doi.org/10.1073/pnas.1403112111>  
1146
- 1147 Zeiler, M. D., & Fergus, R. (2013). Stochastic Pooling for Regularization of Deep Convolutional Neural  
1148 Networks. *ArXiv:1301.3557 [Cs, Stat]*. Retrieved from <http://arxiv.org/abs/1301.3557>  
1149
- 1150 Zhang, N. R., & Heydt, R. von der. (2010). Analysis of the Context Integration Mechanisms Underlying  
1151 Figure–Ground Organization in the Visual Cortex. *The Journal of Neuroscience*, *30*(19), 6482–  
1152 6496. <https://doi.org/10.1523/JNEUROSCI.5168-09.2010>  
1153

Figure 1

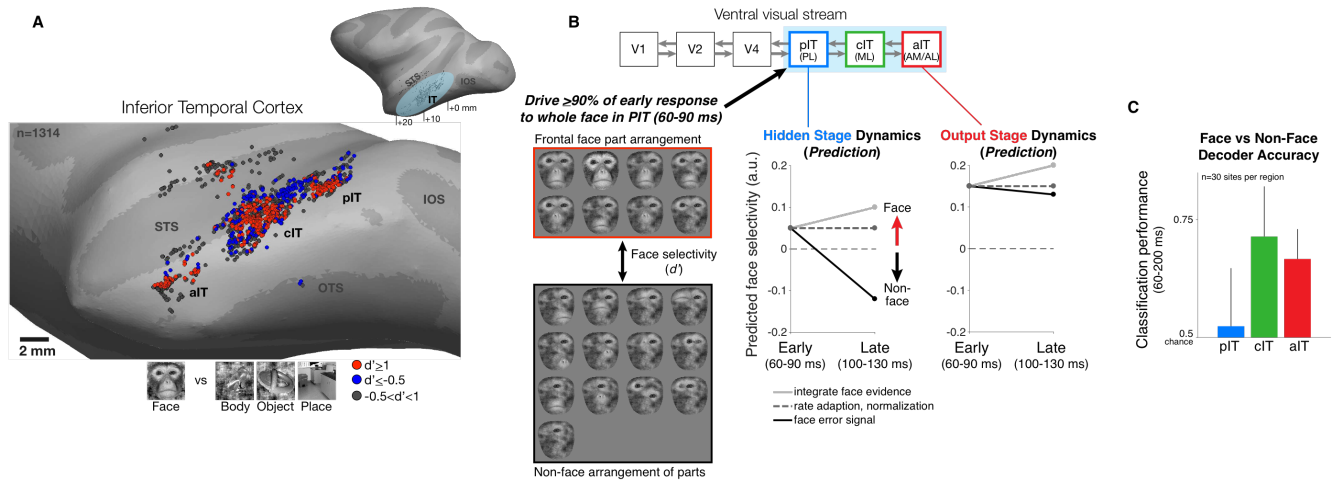

1154  
1155

1156 **Figure 1. Neural recordings and experimental design in face-selective subregions of the ventral**  
 1157 **visual stream. (A)** Neurons were recorded along the lateral convexity of the inferior temporal lobe  
 1158 spanning the posterior to anterior extent of IT (+0 to +20 mm AP, Horsely-Clarke coordinates) in two  
 1159 monkeys (data from monkey 1 are shown). Based on prior work, face-selective sites (red) were  
 1160 operationally defined as those with a response preference for images of frontal faces versus images of  
 1161 non-face objects (see **Methods**). While these neurons were found throughout IT, they tended to be  
 1162 found in clusters that mapped to previously identified subdivisions of IT (posterior, central, and anterior  
 1163 IT) and corresponded to face-selective areas identified under fMRI in the same subjects (Issa &  
 1164 DiCarlo, 2012)(Issa et al., 2013) (STS = superior temporal sulcus, IOS = inferior occipital sulcus, OTS =  
 1165 occipitotemporal sulcus). (B) (top diagram) The three visual processing stages in IT lie downstream of  
 1166 early visual areas V1, V2, and V4 in the ventral visual stream. (left) We designed our stimuli to focus on  
 1167 the intermediate stage pIT by seeking images of faces and images of non-faces that would, on  
 1168 average, drive equally strong initial responses in pIT. Novel images were generated from an exemplar  
 1169 monkey face by positioning the face parts in different positions within the face outline. This procedure  
 1170 generated both frontal face and non-face arrangements of the face parts, and we identified 21 images  
 1171 (red and black boxes) that drove the mean, early (60-100 ms) pIT population response to  $\geq 90\%$  of its  
 1172 response to the intact face (first image in red box is synthesized whole face; compare to the second  
 1173 image which is the original whole face), and of these 21 images, 13 images contained non-face  
 1174 arrangements of the face parts. For example, images with an eye centered in the outline (black box, 3<sup>rd</sup>  
 1175 and 4<sup>th</sup> rows) as opposed to the lateralized position of the eye in a frontal face (red box) have a global  
 1176 interpretation (“cyclops”) that is not consistent with a frontal face but still evoked strong pIT responses.  
 1177 Selectivity of neural sites (see **Figs. 3 & 4**) for face versus non-face images was quantified using a  $d'$   
 1178 measure. (middle) Computational hypotheses of cortical dynamics make differing predictions about how  
 1179 neural selectivity in pIT may evolve following an initial, weak preference signal for images of frontal  
 1180 faces. (right) Predictions of how aIT would behave as an output stage building selectivity for images of  
 1181 frontal faces through multiple stages of processing. (C) A population decoder, trained on average firing  
 1182 rates (60-200 ms post image onset, linear SVM classifier) for frontal face versus non-face  
 1183 arrangements of the face parts in this image subset, performed poorly in pIT on held-out trials of the  
 1184 same images (trial splits used so that the same images were shown in classifier training and testing).  
 1185 However, the particular class (face vs non-face) could be determined at above chance levels when  
 1186 reading the clT and aIT population responses.  
 1187

Figure 2

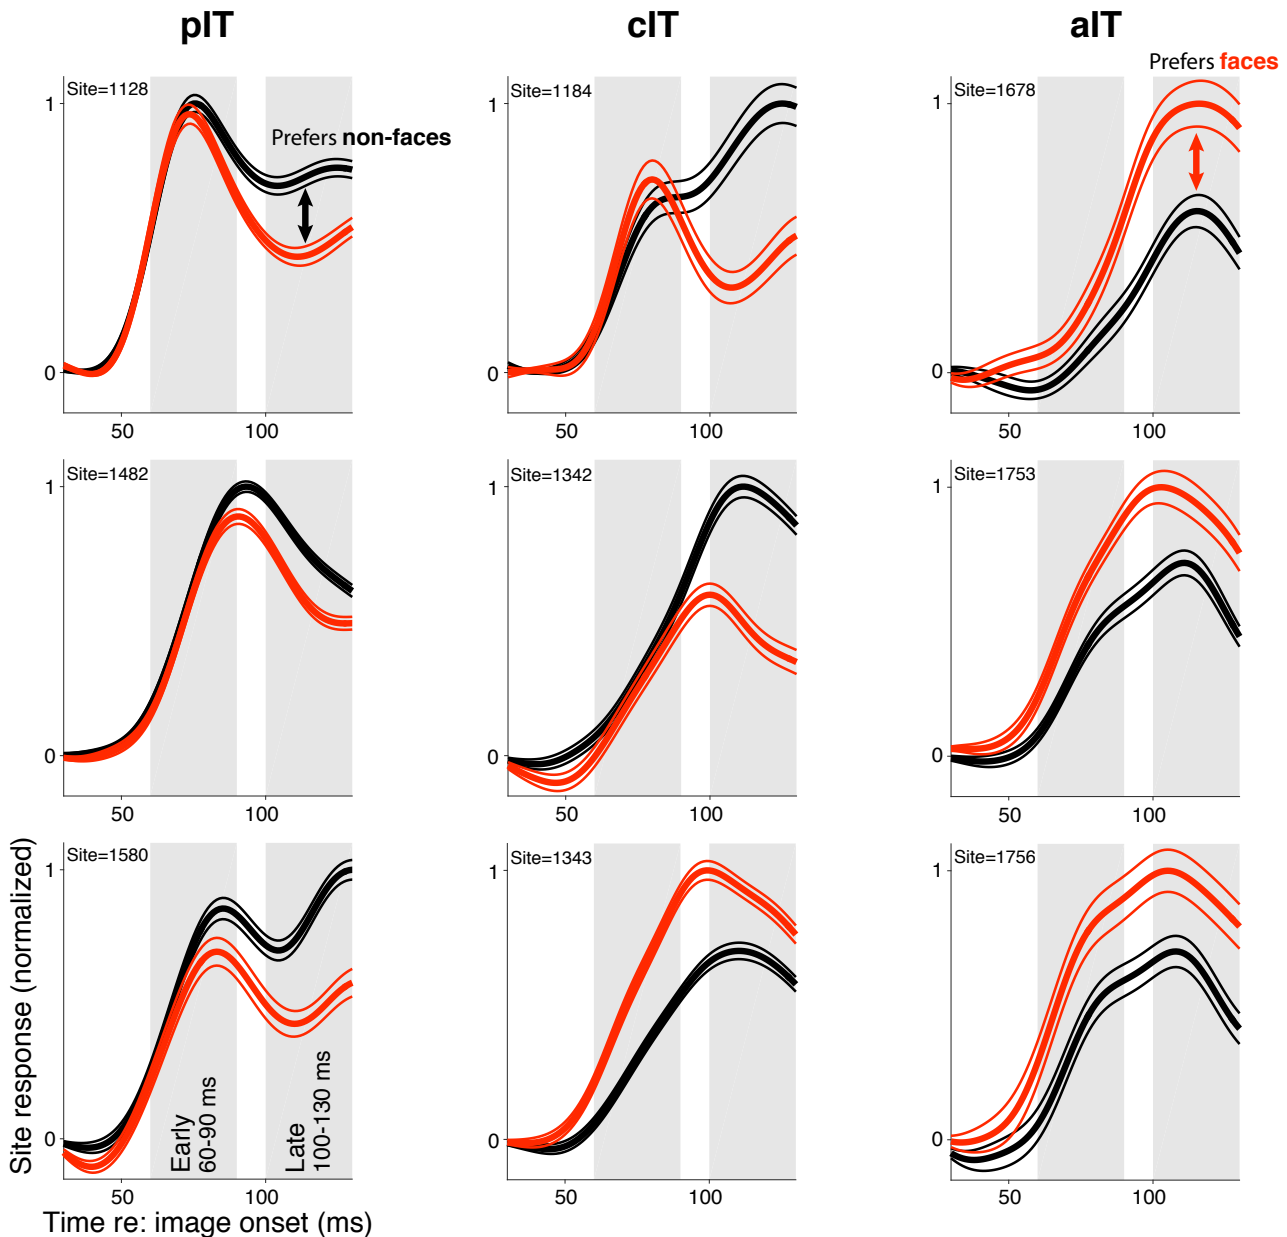

1188  
1189  
1190  
1191  
1192  
1193  
1194  
1195  
1196  
1197

**Figure 2. Responses in example sites to face-like images with typical and atypical face part arrangements.** The three sites with the highest selectivity in the late response phase in each region are shown (pIT, cIT, and aIT; left, middle, and right columns, respectively) ( $d'$  selectivity measured in a 100-130 ms window, gray shaded region shown in bottom, left panel). While the three aIT sites (right column) demonstrated late phase selectivity for face images, the three pIT sites evolved the opposite preference in their late phase (100-130 ms) responses (red line = mean response of 8 images shown in **Figure 1B** red box, and black line = mean response of 13 images shown in **Figure 1B** black box).



**Figure 3**

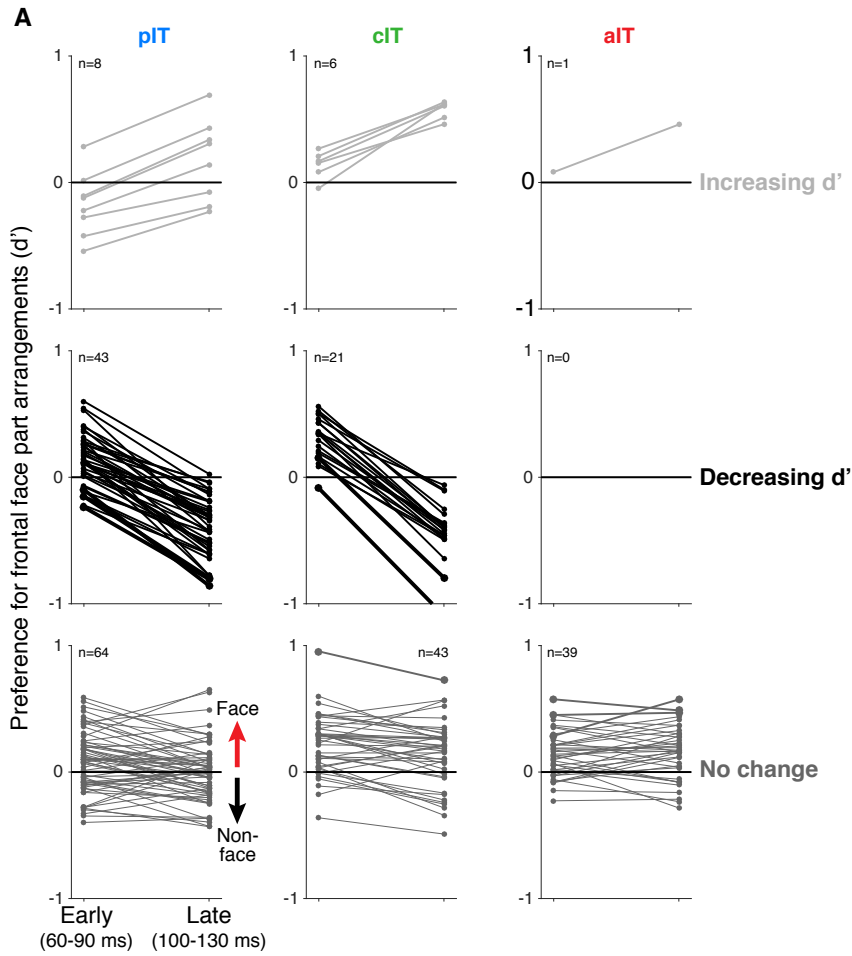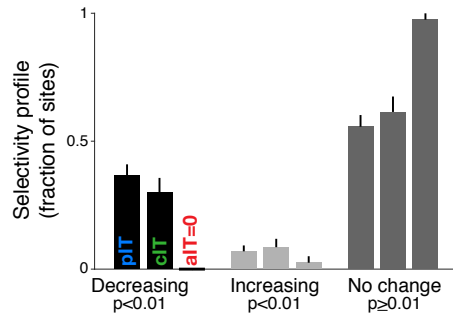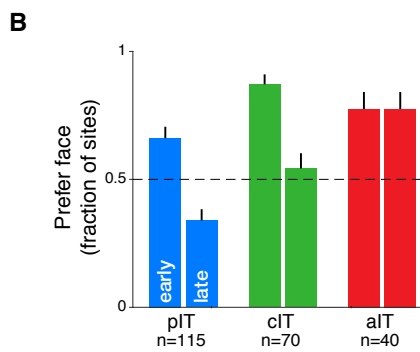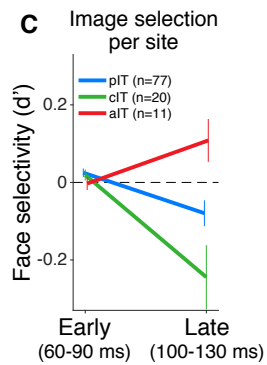

1199 **Figure 3. Time course of neural response preferences in pIT, cIT, and aIT for images with face**  
1200 **versus non-face arrangements of the parts. (A)** Preferences for frontal face versus non-face part  
1201 arrangements for each site are plotted in both early (60-90 ms post image onset) and late (100-130 ms)  
1202 time windows. Sites are grouped based on region (pIT, cIT, aIT) and whether they showed a significant  
1203 change in selectivity from early to late time windows (light gray = increased preference, black =  
1204 decreased preference, and dark gray = no change in preference for face versus non-face images,  
1205 significance tested at  $p < 0.01$  level; example sites from **Figure 2** are plotted using thicker, darker  
1206 lines). Many sites in pIT and cIT showed a decreasing preference for frontal face versus non-face  
1207 images over time (black lines, middle row, left and center panels). In contrast, no sites in aIT had this  
1208 dynamic (middle row, right panel). **(B)** The fraction of sites whose responses showed a preference for  
1209 images of typical, face-like arrangements of the face parts in pIT (blue), cIT (green) and aIT (red) in the  
1210 early (60-90 ms) and late (100-130 ms) phase of the response. Note that, in the late phase of the  
1211 response, most pIT neurons paradoxically showed a preference for non-face arrangements of face  
1212 parts. **(C)** Selectivity measured for images driving similar responses within a site. This procedure  
1213 ensured matched initial responses on a site-by-site basis rather than using a fixed set of images based  
1214 on the overall population response (i.e. the fixed image set of **Figure 1B**; here, the initial  $d'$  for 60-90  
1215 ms is close to zero when images are selected site by site). Although initial response differences were  
1216 near zero when using site based image selection, a late phase preference for non-face images still  
1217 emerged in pIT and cIT but not in aIT similar to the decreasing selectivity profile observed when using a  
1218 fixed image set for all sites.  
1219



**Figure 4**

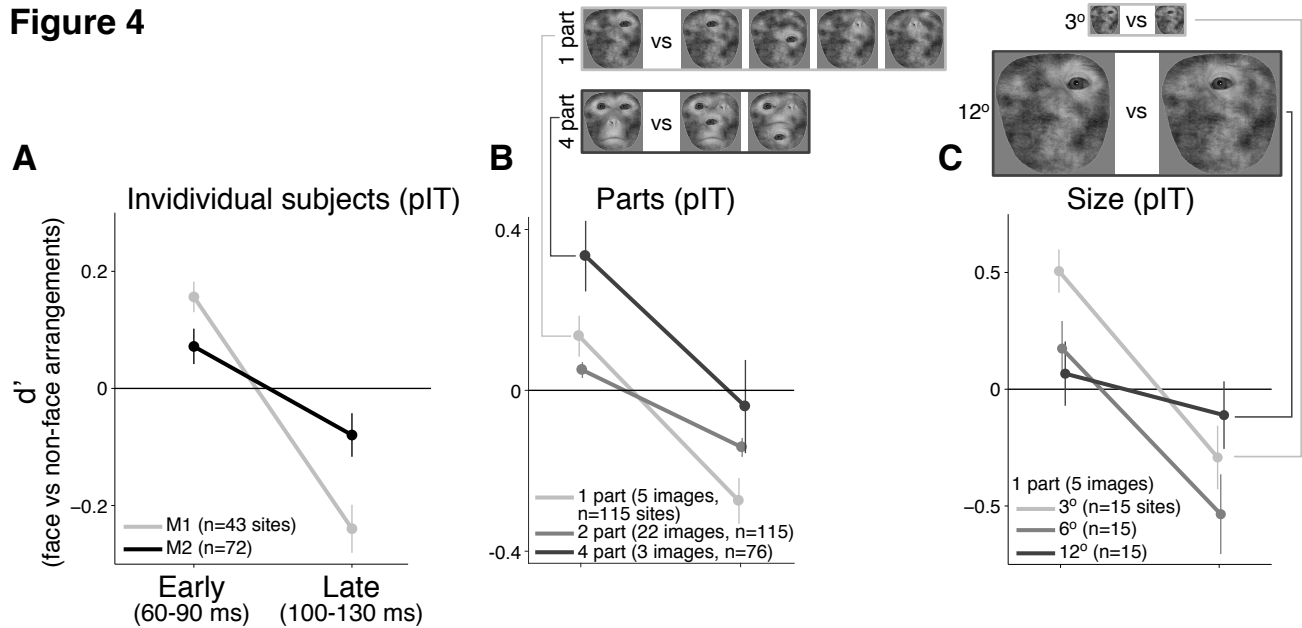

1220  
1221  
1222  
1223  
1224  
1225  
1226  
1227  
1228  
1229  
1230  
1231

**Figure 4. Individual monkey comparison and image controls for the decreasing selectivity profile in pIT. (A)** Preference for images with frontal face part arrangements analyzed separately for each monkey. Median  $d'$  of pIT sites in both early and late time windows is shown. **(B)** Preference for images with face versus non-face arrangements of the parts was re-computed using image subsets containing the same number of parts in the outline (the five 1-part and the three 4-part image subsets shown at top; the larger 2-part subset contained 30 images and is not shown). **(C)** The 1-part image subset was further tested at three different sizes ( $3^\circ$ ,  $6^\circ$ , and  $12^\circ$ ). In all cases, pIT responses showed a decreasing preference over time for typically-arranged face parts leading to a preference for atypically arranged face parts in the later time window (100-130 ms).

Figure 5

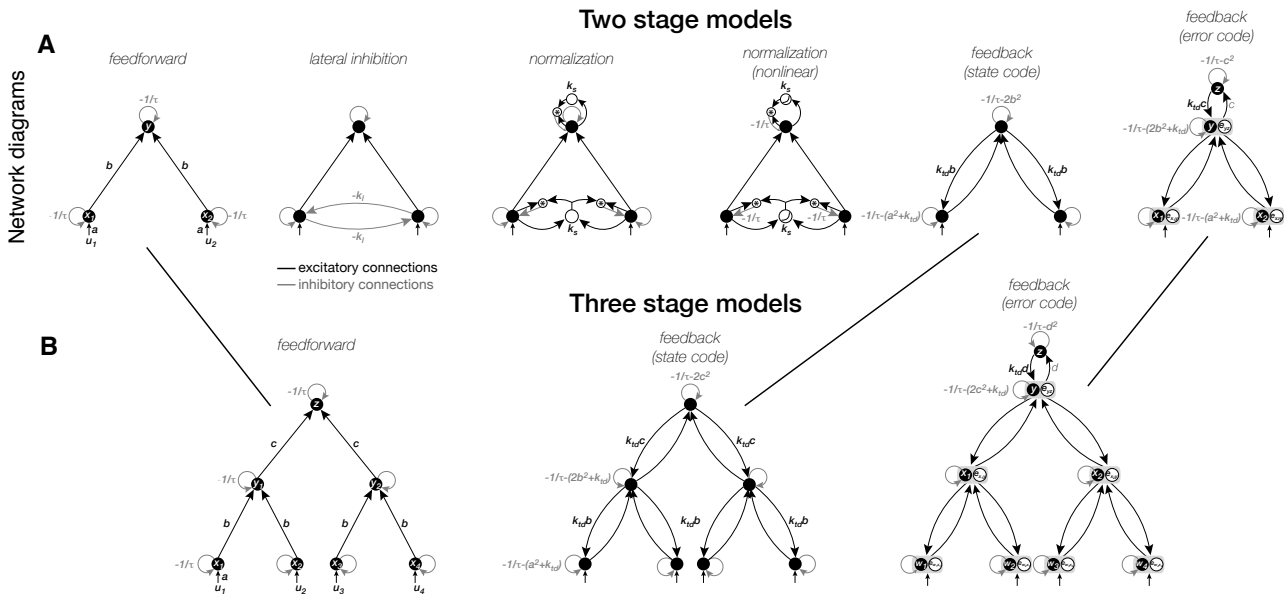

1232  
1233  
1234 **Figure 5. Model diagrams. (A)** Network diagrams of two-stage models used in **Figure 7A,B**. The base  
1235 feedforward architecture and parameters are shown in the first column while recurrent models with  
1236 added connections and parameters are shown in the remaining columns. All models have two inputs  
1237 ( $u_1, u_2$ ), at least two hidden units ( $x_1, x_2$ ) (a.k.a. layer 1 of the network), and at least one output unit ( $y$ ).  
1238 For simulations, the inputs  $u_1, u_2$  are set independently to simulate each hidden node receiving different  
1239 amounts of external drive, depending on the choice of the applied image relative to the unit's preferred  
1240 image. The connection weights  $B = [b_1, b_2]$  transforming the hidden stage activations to the output unit  
1241 are modeled as the same ( $b_1 = b_2$ ). All units have self-connections that determine the degree of leak  
1242 current set by the time constant  $\tau$ . In the normalization models, the leak term is additionally controlled  
1243 (linearly or nonlinearly) by the total activity in each stage (third and fourth columns). In the feedback-  
1244 based model, the feedback connections are symmetric to the feedforward connections with weights  $B^T$   
1245  $= [b_1, b_2]^T$ , a column vector (fifth and sixth columns). The error coding feedback model (sixth column)  
1246 has an additional stage that contributes to computation of error in the second stage (see **Methods** for  
1247 details). **(B)** Extensions of the two-stage model architectures to three stages are shown only for the  
1248 feedforward and feedback models (compare to two-stage diagrams in **(A)**). The three-stage model has  
1249 an additional hidden processing stage compared to the two-stage model. An extra node is introduced at  
1250 the top of the hierarchy to produce an error signal in the third stage of the error coding model.  
1251

Figure 6

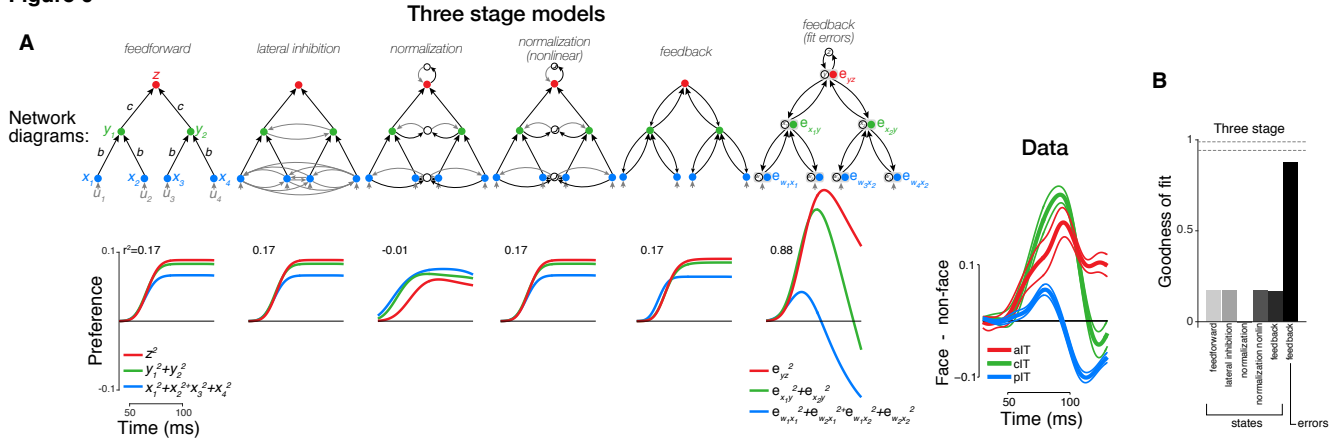

1252  
1253  
1254  
1255  
1256  
1257  
1258  
1259  
1260  
1261  
1262  
1263  
1264  
1265  
1266  
1267  
1268  
1269  
1270  
1271  
1272  
1273  
1274  
1275  
1276

Figure 7

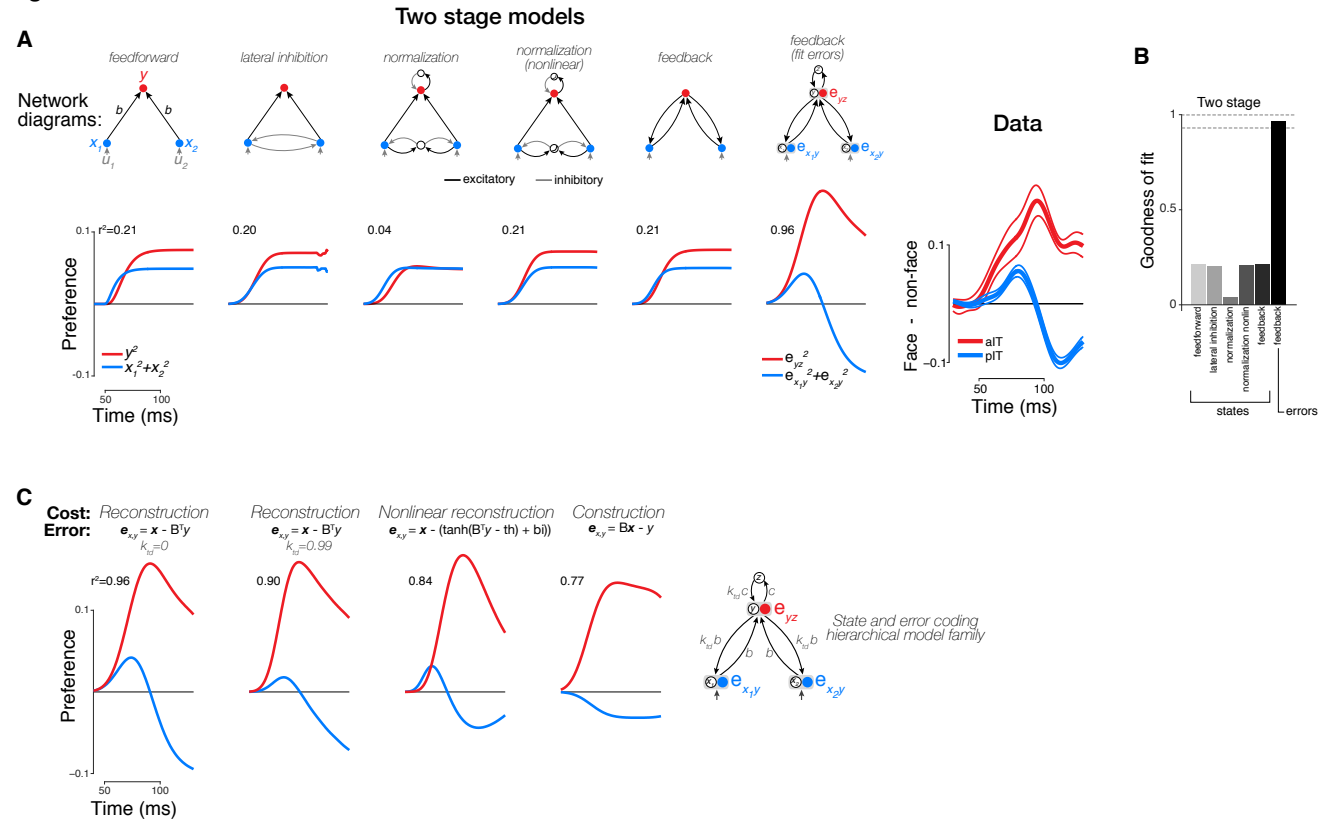

1277  
1278

1279

1280

1281

1282

1283

1284

1285

1286

1287

1288

1289

1290

1291

1292

1293

1294

1295

1296

1297

1298

1299

1300

1301

1302 errors of construction did not match the data as well as reconstruction errors (compare fourth column to  
1303 first three columns) although both types of error outperformed all state-based models and were overall  
1304 very similar (compare to **(A)**).  
1305

**Figure 8**

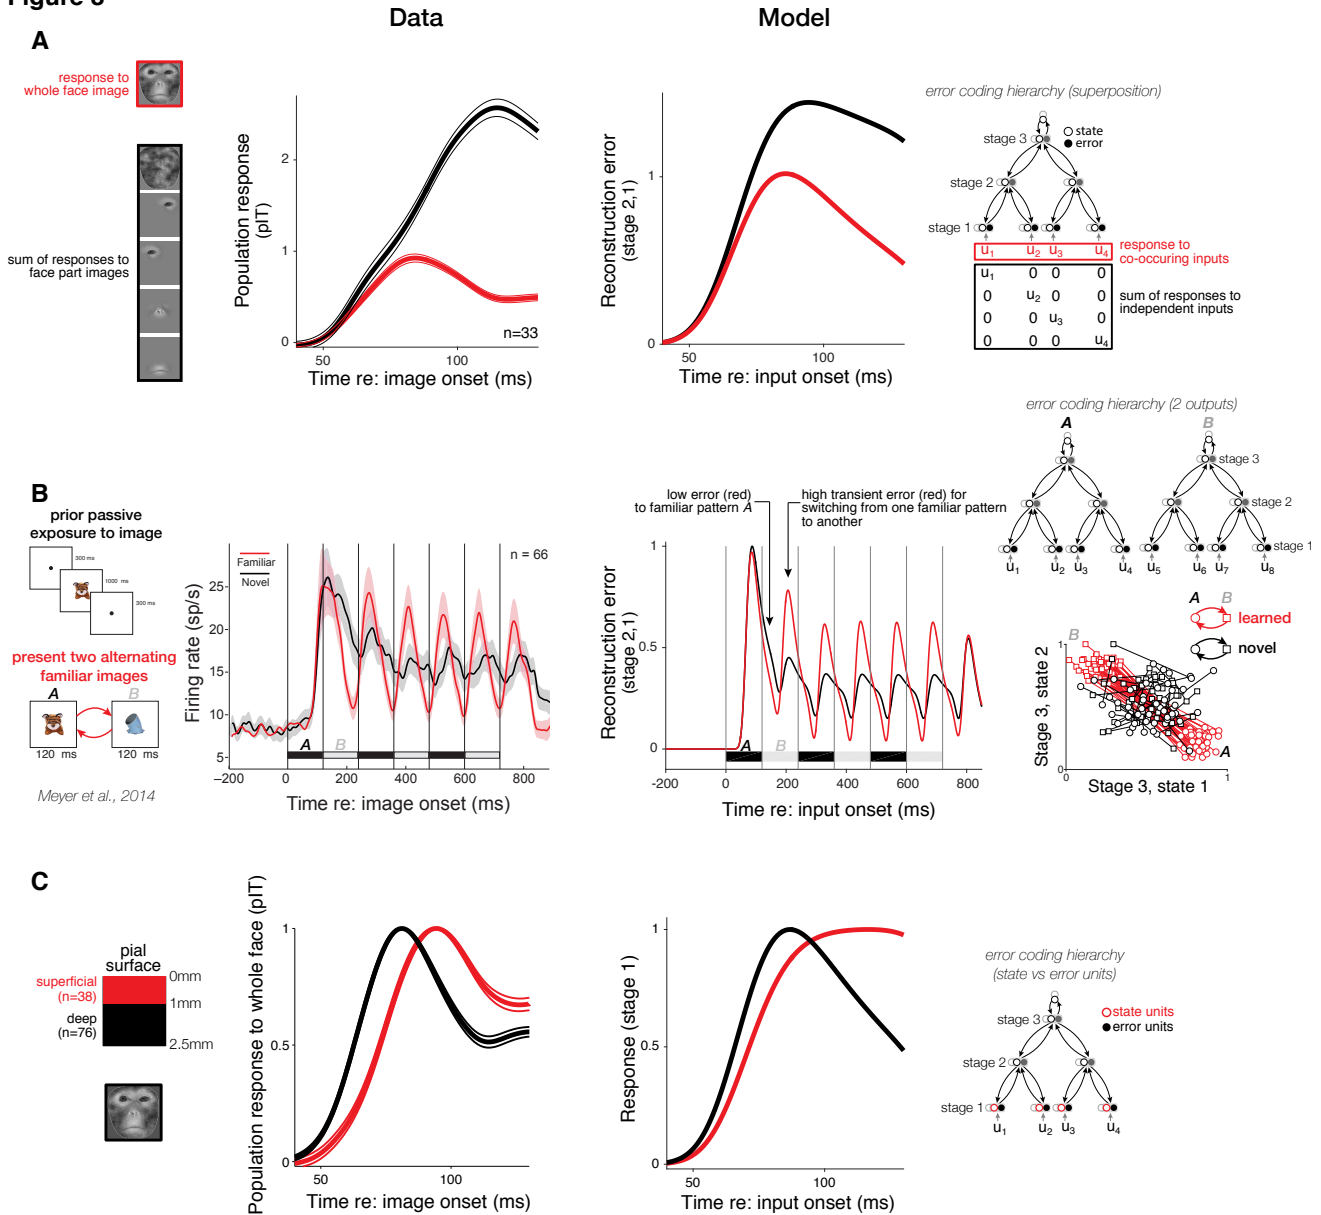

1306  
1307

1308 **Figure 8. Comparison of neuronal phenomena to predictions of a feedback-based error coding**  
 1309 **model.** To generate model predictions, the architectural parameters of the model (i.e. connection  
 1310 weights and time constants) were held fixed, and only the input patterns  $u$  were varied. **(A)** Neuronal  
 1311 (left panel): in pIT, we found that the sum of the neuronal response to the face parts presented  
 1312 individually (black) exceeded the response to the same parts presented simultaneously (i.e. a whole  
 1313 face, red). Each line is the mean response of 33 pIT sites normalized by the peak response to the  
 1314 whole face. Model (right panel): The magnitude of errors between stage 1 and stage 2 of the model  
 1315 showed a similar degree of sublinear integration (responses were normalized by peak response to the  
 1316 simultaneous input condition). **(B)** We extended the model to include two units in the third, output stage  
 1317 that responded to two learned input patterns (see **Methods**) with increased separation of patterns  $A$   
 1318 and  $B$  in this high-level feature space (red markers in far right panel; 50 draws were made from

1319 distributions for *A* and *B* and were compared to pseudo-randomly drawn inputs, black markers). When  
1320 alternating the two learned or familiar patterns *A* and *B*, activations in the top layer of the networks  
1321 experienced greater changes than when two randomly selected patterns were alternated (compare  
1322 distances traversed in high-level feature space by red lines versus black lines, far right panel). Because  
1323 of this large change in high-level activations, transient errors were generated back through the network  
1324 for learned patterns. Strong oscillations could be observed in the error signals between stage 1 and  
1325 stage 2 of the model for alternated familiar inputs *A* and *B* (120 ms period) (red curve, middle right  
1326 panel). In contrast, alternating novel inputs with similar amplitude but with patterns not matching the  
1327 learned weights led to small amplitude oscillations in upstream error signals (black curve). Note that the  
1328 average response strength of state signals to novel and familiar inputs was matched at all network  
1329 levels by construction (mean-matched inputs). The differing response dynamics of error signals under  
1330 familiar versus novel patterns are qualitatively consistent with the IT findings for novel versus familiar  
1331 images (left, reproduced with permission from *Figs. 1 & 2b* of Meyer et al., 2014). **(C)** The average  
1332 response to the whole face for pIT sites recorded 0 to 1 mm below the pial surface (left panel;  
1333 superficial recordings, red curve) and for sites 1 to 2.5 mm beneath the pial surface (black curve). (right  
1334 panel) Average response of state units (red) and error units (black) in stage 1 of the model. Note the  
1335 lagged response in state units which is similar to the lagged response of units in superficial recordings  
1336 (red curve, left panel).
